# Supplementary material for: Phylogenetic and Kinetic Characterization of a Suite of Dehydrogenases from a Newly Isolated Bacterium, Strain SG61-1L, That Catalyze the Turnover of Guaiacylglycerol-β-Guaiacyl Ether Stereoisomers
Source: PubMed Central journal article supplement — Appl Environ Microbiol. 2015 Oct 30;81(23):8164–76. doi: 10.1128/AEM.01573-15 (PMC4651090; doi:10.1128/aem.01573-15), 2015-10-30
Supplement: AEM.01573-15_zam999116761so1.pdf [file AEM.01573-15_zam999116761so1.pdf]

## SUPPLEMENTAL MATERIAL

### **Phylogenetic and Kinetic Characterization of a Suite of Dehydrogenases from a Newly Isolated Bacterium, strain SG61-1L, that Catalyze the Turnover of Guaiacylglycerol- $\beta$ -guaiacyl Ether Stereoisomers**

Shannu Palamuru,<sup>a,b</sup> Nikki Dellas,<sup>a</sup> Stephen L. Pearce,<sup>a</sup> Andrew C. Warden,<sup>a</sup> John G. Oakeshott<sup>a</sup>, Gunjan Pandey,<sup>a,#</sup>

<sup>a</sup>CSIRO Land & Water Flagship, Acton, ACT, Australia

<sup>b</sup>Research School of Chemistry, Australian National University, Acton ACT, Australia

Running Head: Characterization of GGE dehydrogenases

#Address correspondence to Gunjan Pandey, [gunjan.pandey@csiro.au](mailto:gunjan.pandey@csiro.au)

S.P and N.D. contributed equally to this work

**Construction of NADH and MPHPV standard curves.** The NADH standard curve (shown below) was constructed by adding varying amounts of NADH to wells simulating kinetic assay reaction conditions (50mM Tris pH 8.0 at 28 °C). The MPHPV standard curve was constructed as follows: a GGE dehydrogenase reaction was set up to convert the GGE substrate to MPHPV. The peak corresponding to MPHPV was extracted from the LC-MS and any remaining GGE was quantified. The amount of biosynthetic MPHPV was quantified by subtracting the remaining GGE from the amount of GGE added to the initial reaction. The MPHPV fraction from the LC-MS was then evaporated to dryness and resuspended in 50mM Tris pH 8.0. The standard curve for MPHPV (shown below) was then constructed similarly as for the NADH standard curve.

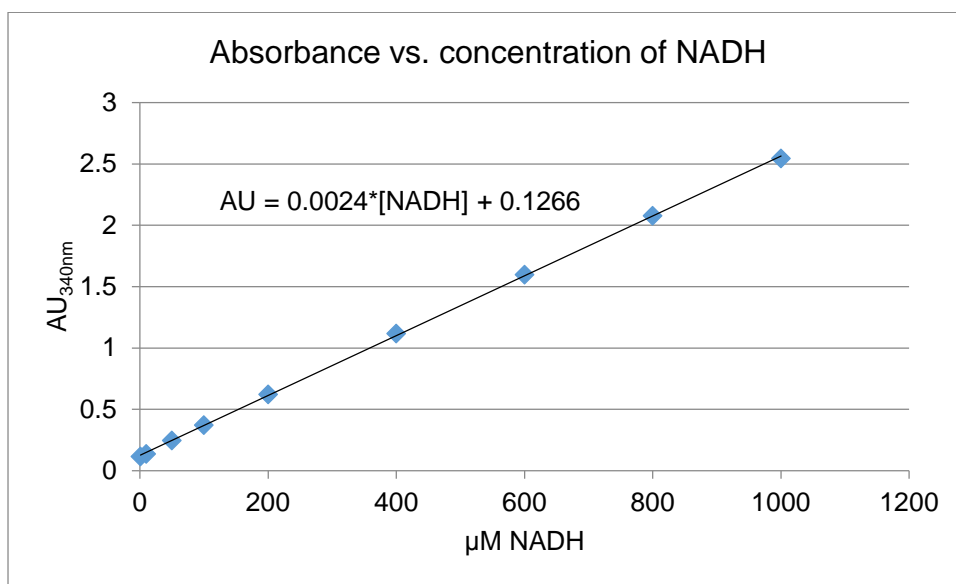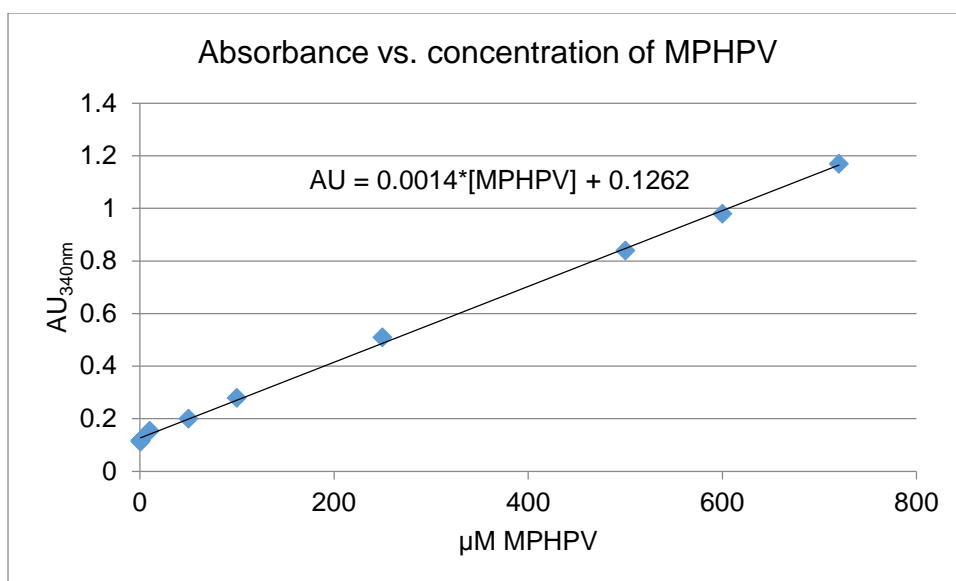

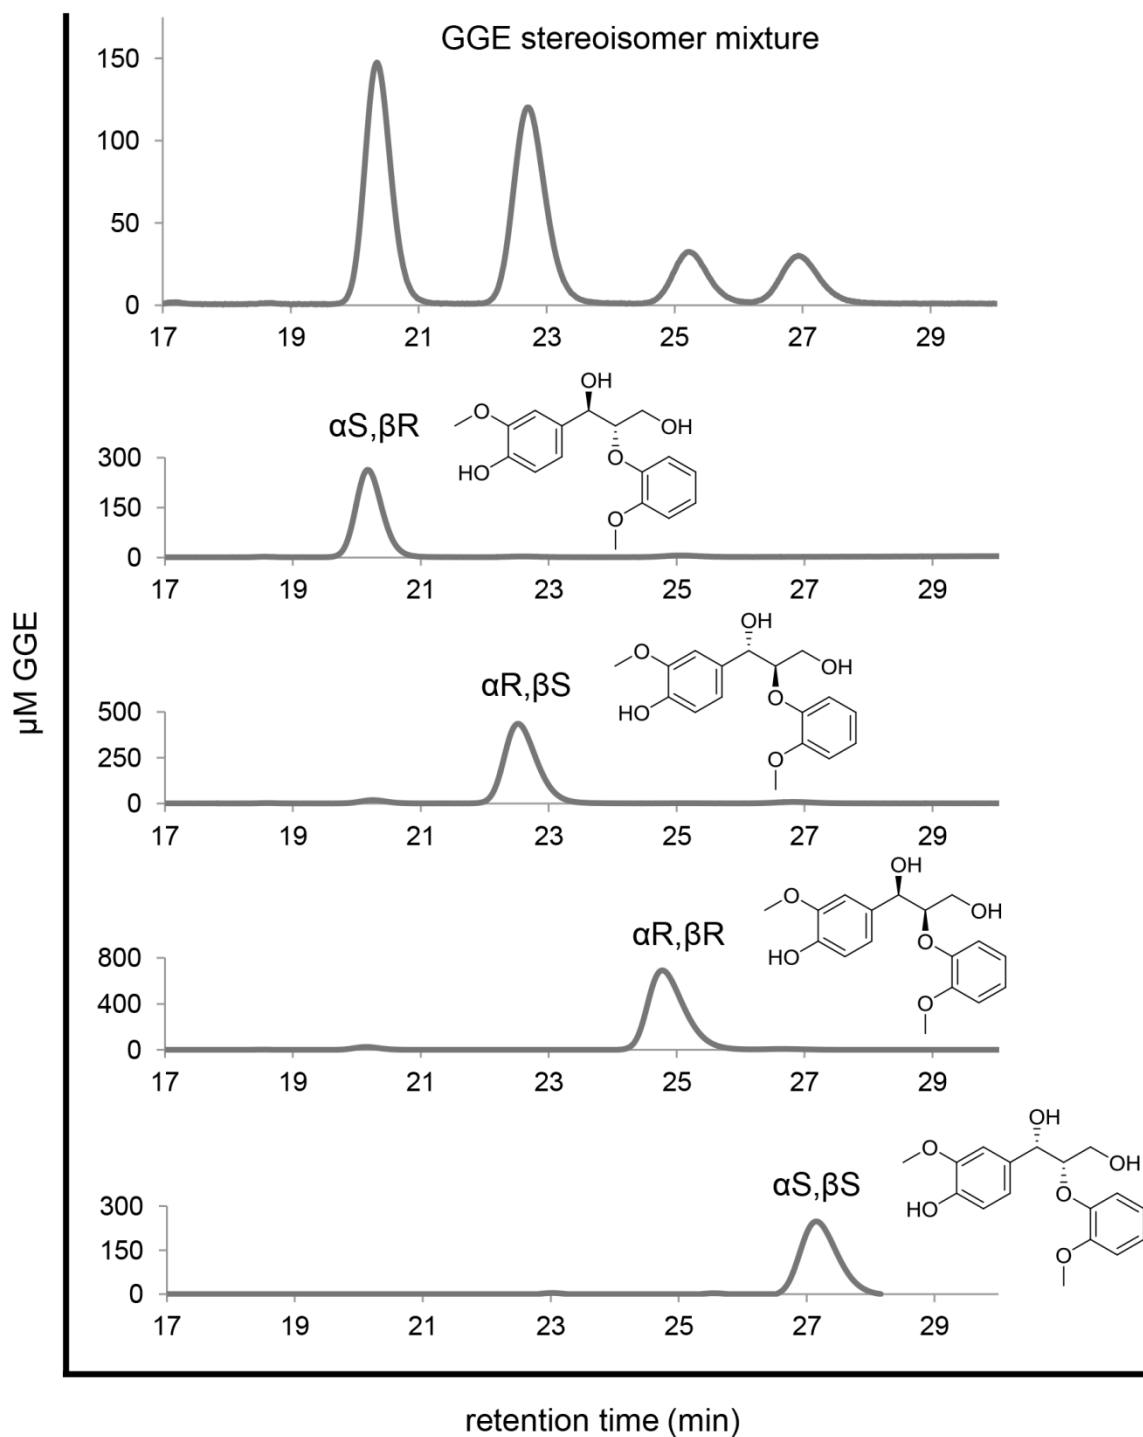

**FIG. S1.** Chiral column separation of GGE stereoisomers. The GGE mixture (top panel) and each individual stereoisomer (bottom four panels) was run separately through the chiral column on the TOF LC-MS.

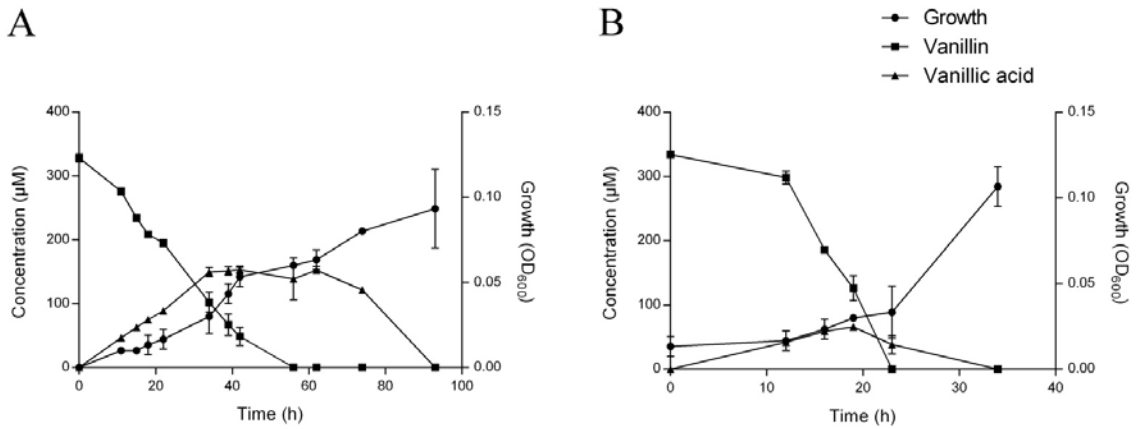

**Fig. S2. Growth of SG61 (panel A) and SYK-6 (panel B) on monoaryl compounds over time.** For each graph, the left y-axis shows the concentration of metabolite and the right y-axis shows the OD<sub>600</sub> values for either bacteria. Both bacteria were monitored for growth using vanillin as a sole carbon source. The experiments were monitored for disappearance of vanillin and formation / disappearance of the transient metabolite, vanillic acid.

FIG. S3. Alignment of dehydrogenase genes. Blue blocks are regions of the alignment that were used as input for IQtree.

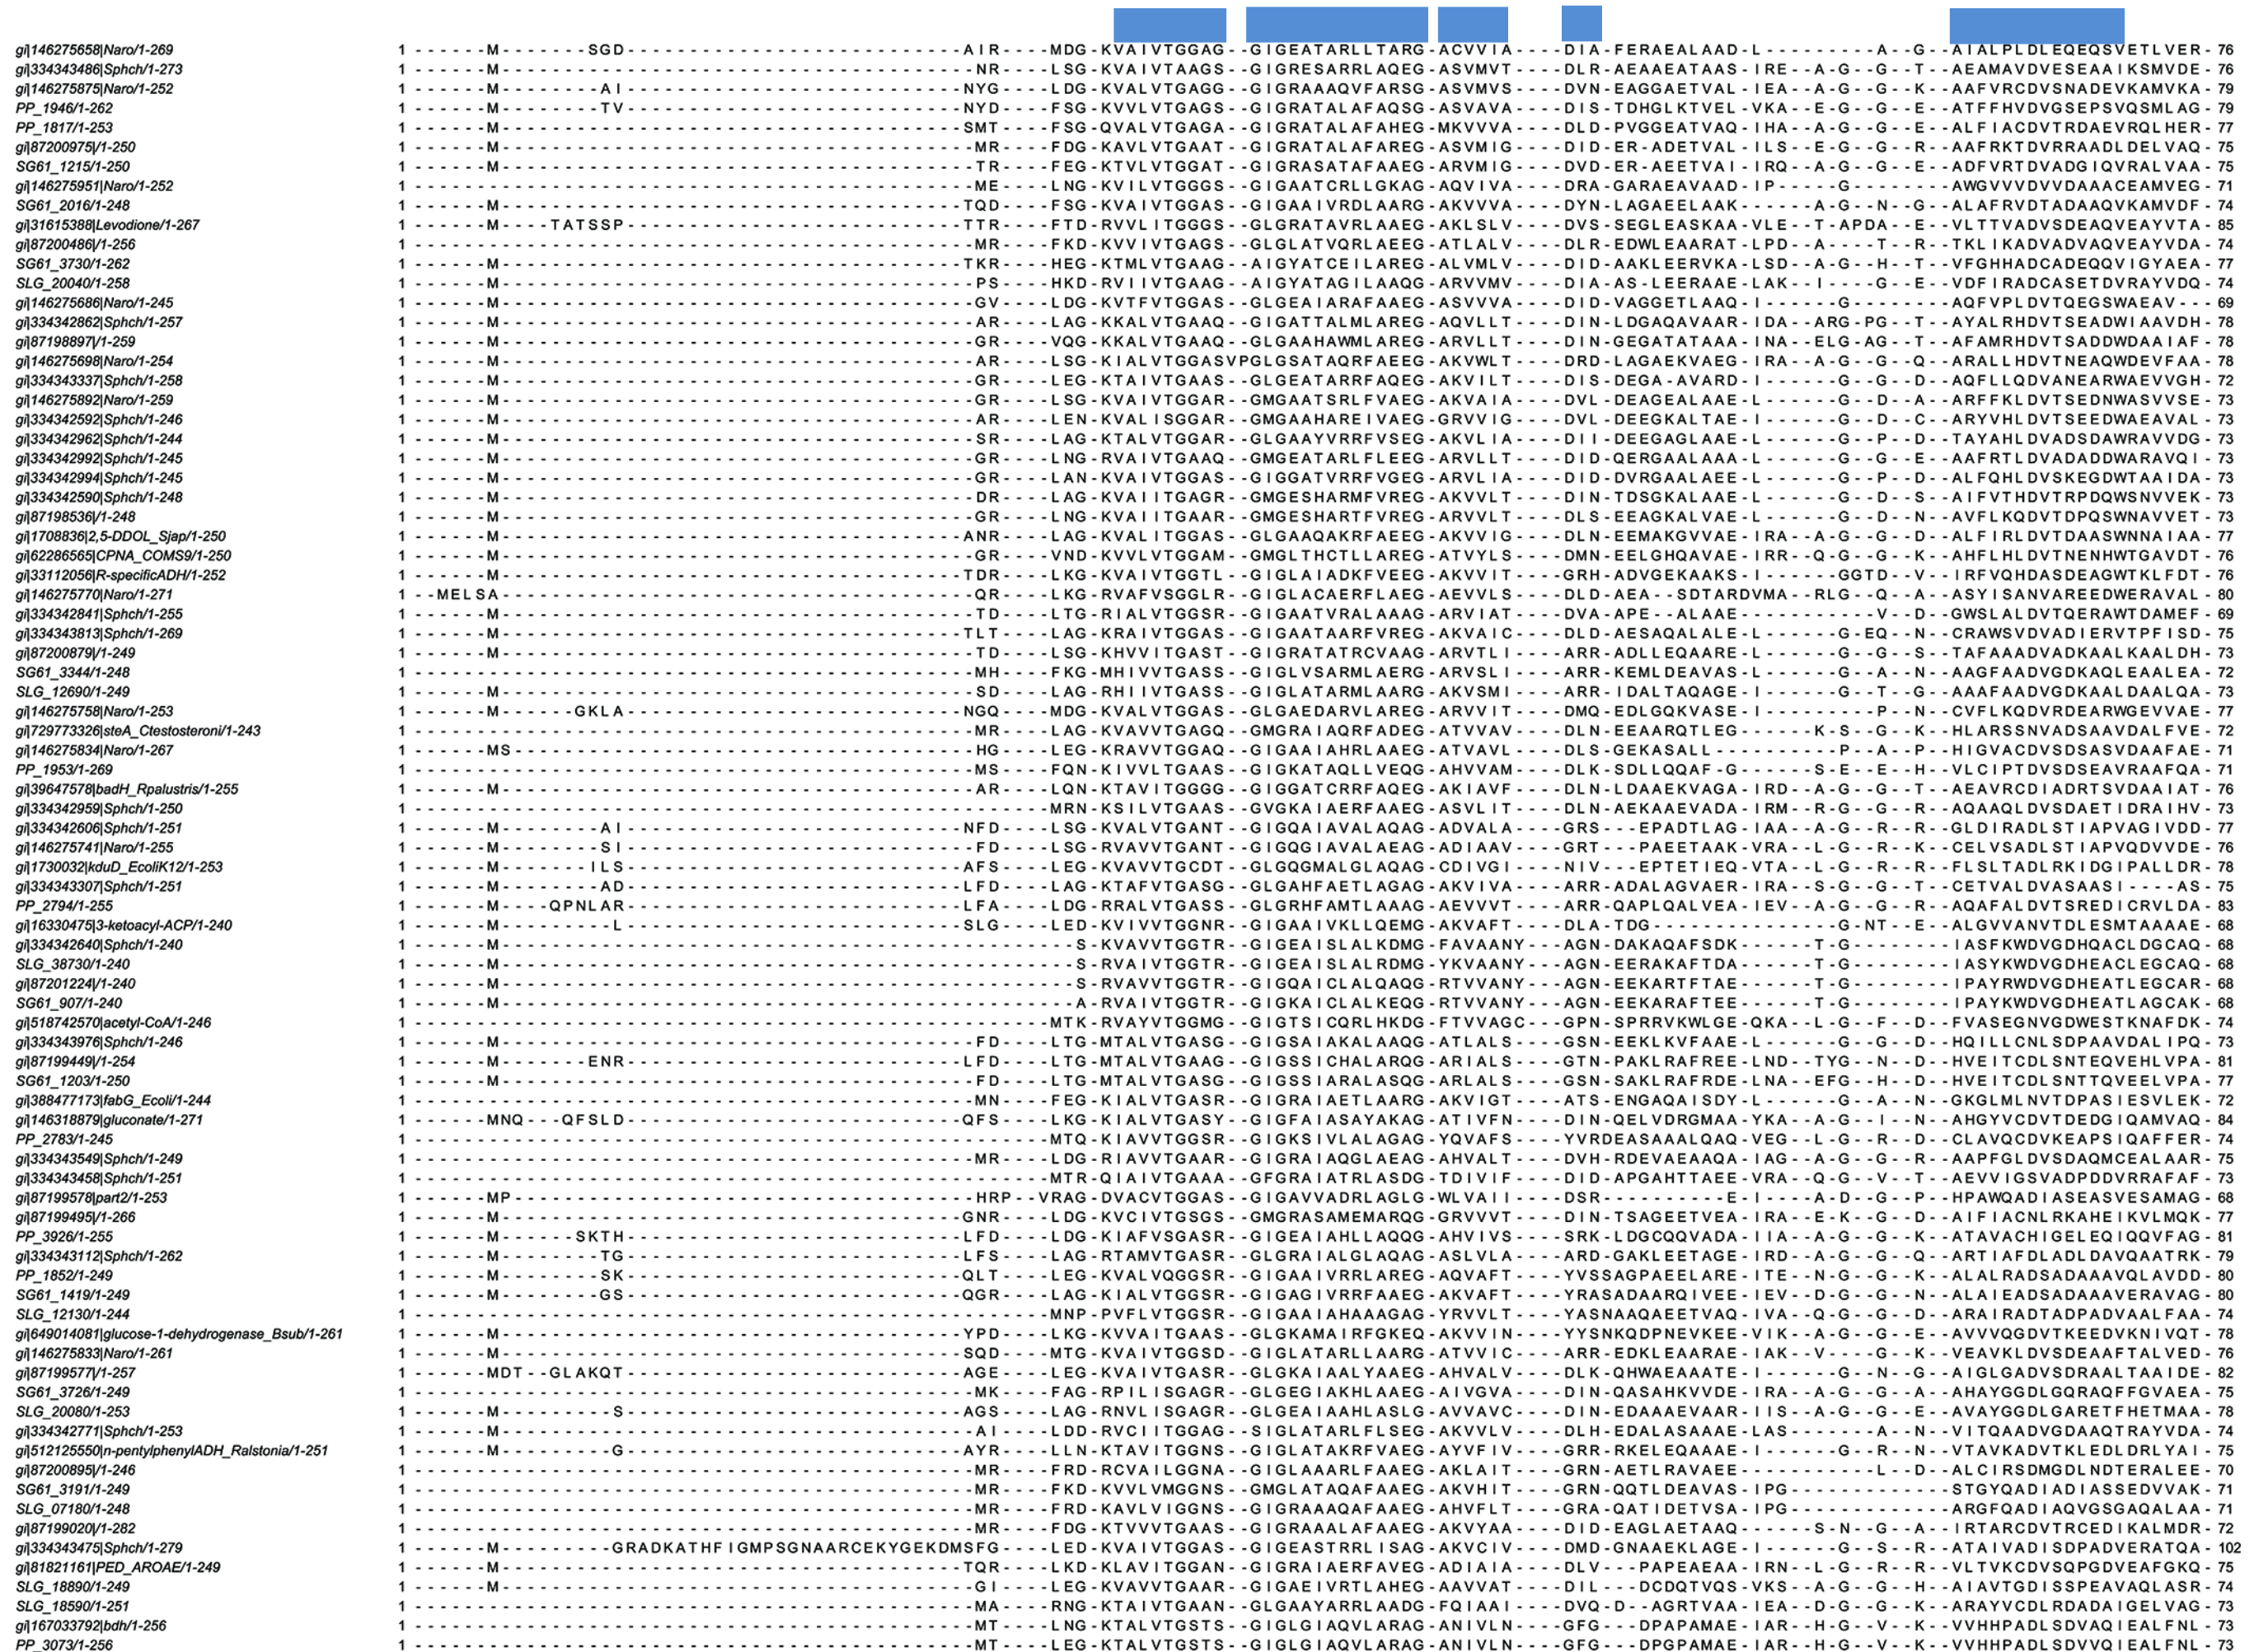

g|84570596|bdh2\_Rpicketti/1-256 1 --- -M-----LQG-KTALVTGSTC--GIGLGAQALAAQG--ANIIVN---GFR--RADGARQQ-IAA--A-GQVI--R--LGYHGADMSKASEIEDMMRY-74
g|33434517|Sphch/1-263 1 --- -M-----LSG-KTALITGSTS--GIGLAYAKALAGEG--ANVVIN---GFGDADAIEKERVG-LEA-LS-G--G--K--ALYSGHDLTKADQIEAMMQE-79
SLG\_32730/1-261 1 --- -M-----MT-----LKG-RTALVTGSTS--GIGLAYAKAFAAQG--ANIVIN---GFGDAGAEQERLA-LEA-AS-G--G--K--AIYSAHDLTRADEIEMMAQ-77
g|87199767|1-261 1 --- -M-----MF-----LKD-KCALVTGSTS--GIGLAYARALAAEG--AHIVLN---GFGDPAEIEALCRE-LAD-AS-G--G--R--AIFAAGDLTRREGTEAMMAT-77
SG61\_1243/1-257 1 --- -M-----MF-----LKG-KRAVVTGSTS--GIGLIARALAGEG--ASVVLN---GFGDAEIASAILHE-LSA-MS-G--A--D--AMHVPADLMQRSGVEALMEA-77
g|84570594|bdh1\_Rpicketti/1-260 1 --- -M-----MQ-----LKG-KSAIVTGAAS--GIGKIAEELLAKEG--AAVAIA---DLN-LEAARAAAG-IEA--A-G--G--K--AIYAVAMDVTSEASVNSQATDE-75
g|334342462|Sphch/1-265 1 --- -M-----TD-----ARR-----LTG-RNALITGSVG--GLGQAMARKLASAG--ANVMLH---GLEEPEEAACLTEA-IER--EFG--V--R--AFYCRADLRQTAARELVDR-81
g|334343092|Sphch/1-255 1 --- -M-----SD-----RRR-----FEG-RSVFITGAGS--GIGEATAHFAEAG--AKVTIA---ELD-PAKGEAVRDA-IRA--K-G--G--T--AIFVATDATDEASVKAIAA-79
g|334343456|Sphch/1-245 1 --- -M-----YD-----FEG-KTLLTGAAG--GIGREVARLFAAHG--ANLVLV---DLN-LLVLAASLADLEI--P-P--E--R--VAVIAFDASSEQAQAQAAVL-76
g|334343408|Sphch/1-258 1 --- -MTF---PLPNA-----SQD-----LSG-QIALVTGATS--GLGYRFARILAHAG--ARVAVA---GRR-KDRLDKVVD-IRA--A-G--G--Q--ACAIIIDVGDAGSLADAVAQ-84
g|146275993|Naro/1-256 1 --- -M-----AGT-----FEG-KVALVTGAAS--GIGRAAIRFAEAG--ARVFCA---DLN-LAGAEVAAG--I-----G--K--G--ASAVQVVDVSNASNAQMVDA-74
g|146275997|Naro/1-246 1 --- -M-----ML-----FEG-KNVIPTGAAS--GIGRATAIRFAEAG--ARVTIG---DKN-VAGLEETAAM-MAS--A-----PVIQPFDVADNASCRLKLEVE-72
g|87199890|1-279 1 --- -M-----GTL-----RFD-----IKG-RSALVTGAAS--GIGLAYAEAMAEAG--AAVTLT---DID-AEGAEREAAAR-LRA--E-G--Y--E--VRAEKL DVSDWDNVAADFDA-81
SG61\_474/1-283 1 --- -M-----KTL-----QFD-----IRG-RSALVTGAAS--GIGLAYAECEMAEG--ARVTLT---DID-GEAAEREAAAR-LRE--A-G--Y--E--ARAAKCDVSKLEDVAAAFDD-81
SLG\_24920/1-278 1 --- -MVSHP-----KALE-----QFD-----IAG-RSAIVTGAAS--GIGLAYAETMAEAG--ARVTLT---DID-DVAGAAEREAAAR-LRA--E-G--Y--D--ARAQDLVSDRARTQVDFE-86
PP\_1951/1-275 1 --- -M-----KLD-----VFS-----VEG-ARVIVTGAAS--GLGLAFTEAMAESG--AQVAML---DLN-REALDAQFR-LRS--L-G--Y--S--VRSHVLDVTRDRAVDVDFNA-81
PP\_2002/1-257 1 --- -MI-----EISG-----TPG-----HNG-RVALVTGAAR--GIGLGAIAAWLICEG--WQVVLV---DLN-RQRGTQVAKA-L---G--D--N--AWFIMTDVADEAQVAGVSE-80
SLG\_15310/1-259 1 --- -M-----ADD-----LFN-----VAG-KVALVTGGS--GIGRMAIEGYAERG--VRTYIT---GRD-FDRLGQIAAD-LSA--STG--G--T--CLPLVADLADPEGPARLVEA-81
g|146275988|Naro/1-261 1 --- -M-----LGM-----LKG-KTUVVTAAGT--GIGFVAKRAEAG--ARLLIS---DFH-ERRLGAAADR-IAA--E-VG-CE--R--PATVVCDVTNEAQQVQLRDA-90
SG61\_609/1-245 1 --- -M-----TALVTGTAS--GIGGAASARWLDAQGIERLILV---DRD-ADGLNALELS-----C--V--VERHAGDVSDPAFWQA-----62
g|146275674|Naro/1-255 1 --- -M-----IQG-LAAIVTGGAS--GLGAATAELLAAR--AKVTLF---DLN-ADLGNAAKAAE--I-----G-----GRFAAVNVDDEDVANAIAE-70
g|334343001|Sphch/1-254 1 --- -M-----FRG-LAAIVTGGAS--GLGGATAERLARGG--AKVTVF---DLN-ADLGEAHAKA--I-----G-----GHF1KVDVTDNEAAYDAALDE-70
g|334343319|Sphch/1-259 1 --- -M-----MK-----LEG-LSAVVTGGAS--GLGAATARALSAHG--VEVALF---DLN-EESGEAVARE--I-----G-----GIFCKADVSSEESI EAAFAK-70
g|87199092|1-261 1 --- -M-----MK-----LDNTVAAVVTGGAS--GLGAATARALAAKG--VKVAF---DLQ-KEKGEAVAAE--I-----G-----GVFCEVNVTSDESVDAGFAK-71
SG61\_354/1-260 1 --- -M-----MK-----IDNTVSAVITGGAS--GLGEATARALAAKG--AKVAF---DLQ-KEKGEVAAE--I-----G-----GIFCQVDVTSDESVDAGFAK-71
PP\_2214/1-255 1 --- -M-----MH-----IAN-KHFIVSGAAS--GLGAATAQMLVEAG--AKVMLV---DLN-AQAVEAKARE--L-----G--D--N--ARFAVADISDEQAQASVDA-72
SG61\_3175/1-254 1 --- -M-----MD-----PAG-KIAIVSGGAS--GLGEGGVKCLLAAG--AEVVSF---DVS-GDAPQ-----G-----AEFIRCDVSDVESVKAADVQ-64
g|146276032|Naro/1-246 1 --- -M-----MM-----EAVLITGGAR--GLGEVLVRAFHAAG--WRVAVS---DID-GDAAHLAIS-LDA--S-G--K--T--ALGLALDVRMGTDFEAARDV-72
g|334342802|Sphch/1-249 1 --- -M-----M-KSALIGGAS--GVGAATARAFAAEG--WRVAVA---DLA-VEPAQAL---VDE--L-G--P--D--HRYRCDITSETDILSLFDK-68
PP\_1708/1-252 1 --- -M-----MS-----QNK-KVALVTGAGS--GIGRAVALALLEDN--FSLVLA---GRR-AEPLQAVVEQ-AL-A--G--G--E--ALAVPTDVRDEQSVAHLFAT-75
SLG\_05090/1-250 1 --- -M-----MTG-RVAVITGAGS--GIGRAVTLTAAR--YRLVLA---GRR-ADALDETAAL--ASG--S-P--E--P--ILCVPTDVSDEGSAVALFKD-73
SG61\_2863/1-244 1 --- -MN---L-----LKG-RVAVVTGASS--GIGACALGYAAAG--AKVVLA---ARR-VDREGLVKK--IED--A-G--G--E--ALAVATDVTSEAVANL FKQ-78
SLG\_35070/1-243 1 --- -M-----QD-----LSR-HTAITGASS--GIGAGIARCFAAAG--ARLILA---ARR-ADRLDALAE-LSA--S-G--A--Q--VLPRPTDVTIEEDVIGLFAD-76
g|146275941|Naro/1-266 1 --- -M-----T-----GNR-----LDN-RAAVVTGAAD--GIGEGIARRFAAG--AAVVVA---DYD-DERGPAVARD-LRG--L-G--A--R--AEFIRCDVSRREDVIGAVDL-78
g|334343077|Sphch/1-254 1 --- -M-----ERP-----LEG-KVALITGSGS--GMGVGIALAVAKAG--AAVLVA---GRT-AQTLERTRAQ-IEA--A-G--G--R--AIVAPCDITDRAQVAAVAR-77
g|334342781|Sphch/1-260 1 --- -M-----SK-----IAG-KRVIITGGAR--GIGADTARYFAHHG--AKVVTF---DIR-DEEGDALAKE--ASS--Q-G-PG--S--VVYRRVDITSIPEINAGVEF-77
SLG\_31530/1-250 1 --- -M-----KRVLTGGA--GIGLAIKRFIEDG--ARVLTC---DVD-ETALNALEA-VPG-----L-LGLHCDVTSREADLDALFGA-67
SG61\_2583/1-255 1 --- -M-----TEQ-RTLLVTGASS--GIGAACARRLAAPG--VRLMLHASGRDEHKRAALEAAE-LAE--G-G--A--Q--TATCFDLAEPGAGTALASA-79
PP\_2175/1-234 1 --- -M-----SVE-----KVAITAGGS--GMGAAAARLAADG--FKVGIL---SSS--GKGEALAAE--L-----G-----GIGVTGSNQSVEDL KRLVDA-68
PP\_0488/1-253 1 --- -M-----KTAFTVGTASS--GFGRAICTLIGKG--YRVI G---ARR-MDKLKALEAE-L-----G--V--N--FIPALDVTDSVSLDKAVEQ-68
g|2506152|YDFG\_ECOLI/1-248 1 --- -M-----MIVLVTGATA--GFGECTRFRICQ--HKVIAT---GRR-QERLQELKDE-L-----G--D--N--LYIAQLDVRNRAIIEEMLAS-67
g|334345036|Sphch/1-249 1 --- -M---A-----GTALITGATA--GIGAAAARRFTAAG--WKVIVT---GRR-AERLDALVAE-L-----G--A--D--KVHAFSDVDMRDEAIDAAALAA-70
PP\_4862/1-254 1 --- -M---T-----STVITGATS--GFGEATARRFAEAG--WKLVLT---GRR-KERLDALCAE-L-----S--A--KTEVHGLVLDVRDRKAMEQAIAN-71
g|334346119|Sphch/1-241 1 --- -M-----TR-----TID-KVVLITGASS--GIGETTRELVAAG--ARLFIG---ARR-TERLKALADE-L-----G--E--N--VAWQELDVTGDAAFADADA-73
SLG\_33310/1-241 1 --- -M-----TG-----VTD-KIILVTGASS--GIGETVRELVTGAG--AKLVIG---ARR-QDLQALAAEE-L-----G--E--Q--VAWQVLDVTDSDSVEAFVAA-73
g|334342779|Sphch/1-273 1 --- -M-----KN-----FSN-RVAVVTGAGS--GIGFGLAERFLAEG--MKVVLG---DIE-AAALDKAVGA--LSE--N--G--E--VLGVQTDVSDFRSLQSLADA-75
g|334342815|Sphch/1-290 1 --- -M-----TE-----VQG-RTAFITGAH--GIGLIARALAADG--VKVALA---DLN-ANALSLCKAE--LAS--I--T-----E--VETVRLDVRDRQGFVEAIDH-75
g|87198230|1-306 1 --- -M-----QS-----FEN-EIAFITGAS--GAGFGQAQVFGAG--AKIVVA---DVR-AEAVEKAVAE--LEG--L-G--I--T--AHGIVLDMIDREAYARAAD-76
SLG\_08640/1-305 1 --- -M-----KD-----FQD-QVAFITGAS--GAGFGQAQVFGAG--AKIVVA---DVR-AEAVEKAVAE--LEG--L-G--I--T--AHGIVLDMIDREAYARAAD-76
SLG\_35880/1-297 1 --- -M-----QD-----LEG-KVAFVTGGGS--GVALGQAKVLAEEAQMVAIA---DIR-QDHLDEAMGY--FSQ--K-N--V--A--VHPVRLDVTDRDQVAAAAD-77
g|87198815|1-310 1 --- -M-----KD-----FAG-RTAFVTGGAN--GVGIGLVRQLLNEG--CKVAIA---DIR-QDHDIDKALAT-LEA--E-G--SGPE--VMGVQLDVASREGFKAAAD-78
SG61\_724/1-305 1 --- -M-----KD-----FAG-RTAFVTGGAN--GVGIGLVRQLLNEG--CKVAIA---DIR-QDHDIDKALAT-LDN--R-----E--VMGVQLDVASREGFKAAAD-74
g|87199892|1-280 1 --- -M-----G-----IET-----FAG-RTAFVTGGAS--GIGLIVKALARR--AFVVIA---DMR-TDHSRALKALAS--A-GLGE--S--VAAVELDVTDRAYASMAAR-80
SG61\_2550/1-291 1 --- -M-----P-----IGS-----FEG-KVAFVTGGAS--GIGLISKVLIERG--AQVVA---DLR-QDHIDHALAL--FAG--G-GQS--N--A--VSAQLDVTNREKYREAAER-80
SLG\_33660/1-289 1 --- -M-----MD-----IAG-TTAFITGAS--GIGFGIAQRLLANG--ARLVLA---DIR-QDHLDEARQF--FEERQ-G--R--N--VHTIRLDVSDRMAQEAARE-77
SLG\_07240/1-277 1 --- -M-----MSFVTGGGS--GIGLIARALAAQG--ARVAIC---DLR-EDHLAQARDV--AAR--E-GWAD--R--FAAFLDVTDRPFGFAALDE-71
g|87198816|1-310 1 --- -M-----MQN-----LPG-KTAFTVGTASS--GIGLIIKALLGAG--MNVVIA---DIR-QDHLDSA---VAE--L-GGG--R--VLAVKLDVTDNRDQFKAADA-75
SG61\_2705/1-303 1 --- -M-----MQD-----VAG-KGAFITGAS--GIGLGMVIFARAG--MNVVIA---DVR-QDHLDTAQAE--LAE--A-GLAG--K--VHGLLDVTDTRDQVAAAAD-78
SG61\_1498/1-309 1 --- -M-----MKE-----VRG-KTAFITGAS--GMGLGMAKAFAEAG--MKVVIA---DIR-QQALDEAMAE--FAH--T-NF---A--VHPIRLDVTDTRDQVAAAAD-76
SLG\_35900/1-311 1 --- -M-----MLD-----VSG-KTAFITGAS--GMGWMAKAFAG--MKVIA---DIR-QDLDQAMEG--FSK--T-NL---A--VHSILLDVTSDRQVAAAAD-76
g|87198727|1-305 1 --- -M-----TRD-----FTG-KTAFITGVN--GIGFIAARAFALAG--MDLILT---YRK-DEDRDAARW--LAD--N-G-LA--P--ARFVRLDVTDRARFAQVAAE-81
SG61\_3329/1-309 1 --- -M-----STA-----DRP-----WEG-RVAFITGAVT--GIGLVQAQAFADAG--MRLALS---YRN-EDDKNRVAEW--FKA--K-G-YE--Q--PLFLKLDVTDRAVFAQVAAE-81
SLG\_12640/1-304 1 --- -M-----D-----WTG-KVAFITGAGT--GIGFGIARAFSDAG--MRLALS---YRN-EAQARCDAA--FAQ--R-G-RE--A--PLWIRLDVTDRAVFAQVAAE-81
SG61\_2549/1-315 1 --- -M-----QE-----LTG-KVAFITGGAN--GIGFGMVRFLAEG--MKVVVA---DWS-TSHIENAKA--LKG--N--N--A--AHFIRTDVADRANLKAADVE-76
SLG\_28340/1-294 1 --- -M-----RN-----FAG-KVAFVTGGAS--GIGLGMVRNFLAEG--MKVVIA---DYN-EDHLDQAREI--LRG--N--N--A--THLIRVDVADRANLKAADVE-75
SG61\_2706/1-296 1 --- -M-----RE-----FRG-KTAFITGGS--GIGLGMARAVLDRG--MNVVVA---DLL-DSHLTEAREL--LGS--T--N--R--LHCLDVTSDRAAMKAAEE-75
PP\_1745/1-269 1 --- -M-----Q-----KRIMITGAGS--GLGREIAQRWARG--WRLALA---DVN-EAGLRETLEQ--VRQ--A-G--G--D--GFVQRCDVDRDYSQTLAQA-72
g|334342965|Sphch/1-259 1 --- -M-----M-----VER-KAIFITGGGS--GIGRAVARRFAAG--WLVGIA---DIH-PAGMAETAA--LPP-----G--S--ASLHQLDVTDRDQVAAAAD-73
g|87199139|1-266 1 --- -M-----MG-KTIFITGAS--GIGRAVARRFAAG--WLVGIA---DIH-PAGMAETAA--LPP-----G--S--ASLHQLDVTDRDQVAAAAD-73
SG61\_504/1-269 1 --- -M-----MTQ-RAIFITGGGS--GIGRAVARRFAAG--WLVGIA---DIH-PAGMAETAA--LPP-----G--S--ASLHQLDVTDRDQVAAAAD-73
SG61\_782/1-273 1 MMP -M-----LGG-QVALVSGAGR--GFGRAIAERLASEG--ARVALL---ARS-LEQLEEVAGT--IRA--S-G--G--E--ALPLACDVTDRASIEAAVEA-79
SLG\_38070/1-265 1 --- -M-----PA-----LAG-EIAIVTGAGR--GFGRAIAERLASEG--AAVALI---ARN-KAQLDEAVAG--IRQ--A-G--G--E--AIALCADVTDPADVDRASVQ-76
SLG\_27950/1-266 1 --- -M-----SA-R-LTE--TVAFVTGGRR--GLGAGIATALAEAG--ASVVVA---ART-LPQVEETVQA--ITR--A-G--G--R--AIVRCDVTDRAVFAQVAAE-77
g|87200928|1-272 1 --- -M-----MA-----FAG-QVVWITGASS--GIGAMARALAAQG--AKLVLS---GRN-EAALAEARNC-----G--D--ALVLPFEATDYAAAASAAK-71
g|146275769|Naro/1-259 1 --- -M-----TIA-----LNN-VVAVVTGAAG--GIGRELVKAMKAA--AIVIAT---DMA-----PSAD--VE---G---A--DHYLQHDVTSEAGWKAVAAL-68
g|146275845|Naro/1-289 1 --- -M-----ARET-----DNRDRDAFAG--GVAVITGAGS--GIGAGLARRAGELG--MTVVV---DIN-QEGAARTVGE--IEA--A-G--G--K--AEALRVDVSPPEELDRLEAET-85
4BMV:A|PDBID|n-pentyl/1-262 1 --- -M-----TTL-PTVLITGASS--GIGATYAEERFARR--HDLVLV---ARD-KVRLDALAAR--LRD--ESG--V--A--VEALQADLTRPADLAAVEIR-75
PP\_2989/1-264 1 --- -M-----TTR-PTVLITGASS--GIGATYAEERFARR--HDLVLV---ARD-KVRLDALAAR--LRD--ESG--V--A--VEALQADLTRPADLAAVEIR-75
SLG\_18780/1-267 1 --- -M-----VTM--KKALVTGSSS--GIGAFAAHLARRG--SDLVLV---ARR-QDRETLAER--LRG--ETG--V--S--VEVLKADLADPTDLHRIER-75
PP\_0429/1-260 1 --- -M-----MT-RYAMITGASS--GLGLALAEALARRG--RNLILV---ARQ-RETLEPVAIE--LQ--RFG--V--E--VLFACDLSPQLRLSGFVLE-73
g|334343146|Sphch/1-268 1 --- -M-----GR-----LAG-KVAVIMGATREGNMQQA--ARRFLDEG--AHVVVS---GRG-KEGLDVFAAA---T-G-----ATAMACDIGSRAQLQSLADA-73
g|334343373|Sphch/1-250 1 --- -M-----QTILITGASS--GYGLETARHFLEAG--WNVIAT---MRS-PDRS-----VLP--P-S--E--N--LRVLPLDVTSEASIAATLVEA-65
SG61\_417/1-252 1 --- -M-----KTVLITGCS--GYGLETARHFHANG--WNVIAT---MRH-PRAD-----ILP--A-D--D--R--MRIVPLDVTRTESIAEIAE-65

g|146275658|Nara/1-269 77 T V A H F - G R L - D V L H N - - - - - N A A L - L G - P E I A Q A - - - - - D G D V E R - - - - - M G T A L W D R T F A V N V R G T M I A - - C R A A L P H L - - - - - R E - - - - - T - - - - - R - - - - - G C I V N T V S N 148  
g|334343486|Sphch/1-273 77 S V A R F - G R L - D I L H N - - - - - N A A L - L D - P D I T P L - - - - - D L S V V T - - - - - I P A D L W D R V M A V N V R S V M L G - - C K Y A I P V M - - - - - L E - - - - - N G - - - - - G - - - - - G S I I N T G S T 149  
g|146275875|Nara/1-252 80 T V D T F - G G L - D C A F N - - - - - N A G I - N R - - - - - - - - - - - V T D - - - - - D Q Y D D A I W E R D I A I N L S G V M R C - - M R E E S A V M - - - - - L E - - - - - R G - - - - - G - - - - - G A I V N T A S I 145  
P P \_ 1 9 4 6 / 1 - 2 6 2 80 V V A H Y - G G L - D I A H N - - - - - N A G I - E A - N - - - - - I V P L A E - - - - - L D S D N W R R V I D V N L S S V F Y C - - L K G E I P L M - - - - - L K - - - - - R G - - - - - G - - - - - G A I V N T A S A 147  
P P \_ 1 8 1 7 / 1 - 2 5 3 78 L M A A Y - G R L - D Y A F N - - - - - N A G I - E I - E - - - - - Q H R L A E - - - - - G S E A E F D A I M G V N V K G V W L C - - M K Y Q L P L L - - - - - L A - - - - - Q Q - - - - - G - - - - - G A I V N T A S V 145  
g|87200975|1-250 76 C L D R F - G R M - D A A F N - - - - - N A G V - L P - P - - - - - Q R P I H E - - - - - V P E D E L D L A I D V D F K G V F F A - - M Q A E I R H F - - - - - L K - - - - - V G - - - - - G - - - - - G A I V N T A S V 143  
S G 6 1 \_ 1 2 1 5 / 1 - 2 5 0 76 C L K R F - G S M - D A A F N - - - - - N A G I - L P - P - - - - - Q R P I H E - - - - - V P D E E L N A A I D V D F K G V W Y C - - V Q A Q V R H F - - - - - L N - - - - - V G - - - - - G - - - - - G A I V N T A S V 143  
g|146275951|Nara/1-252 72 I R E R F - G R L - D G A F N - - - - - N A G I - T E - V T A L G - - - - - G A P I P E T - - - - - H A L P L E V W R K V L S V D L D G V F N C - - L R A E I P L M - - - - - L A - - - - - S G - - - - - G - - - - - G A I V N T T S L 146  
S G 6 1 \_ 2 0 1 6 / 1 - 2 4 8 75 A V A Q F - G R L - D L A V N - - - - - N A G I - A G - A - - - - - D K P V G E - - - - - I D L D D W H R V I D V N L H G V F Y G - - M R Y Q I P A M - - - - - L E - - - - - T G - - - - - G - - - - - G S I V N M A S I 142  
g|31615388|Levodione/1-267 86 T T E R F - G R I - D G F F N - - - - - N A G I - E G - K - - - - - Q N P T E S - - - - - F T A A E F D K V V S I N L R G V F L G - - L E K V L K I M - - - - - R E - - - - - Q G - - - - - S - - - - - G M V V N T A S V 153  
g|87200486|1-256 75 T V A Q F - G R I - D G F F N - - - - - N A G I - E G - R - - - - - Q N L T E N - - - - - F G A E E F H R V I S I N L D G V F Y G - - M A A V L K V M - - - - - R E - - - - - Q G - - - - - F - - - - - G A I V N T A S V 142  
S G 6 1 \_ 3 7 3 0 / 1 - 2 6 2 78 A L K A M - G R V - D G F F N - - - - - N A G I - E G - H - - - - - L A P T H E - - - - - Y E V A E F D R V L H V N L R G M F L G - - L R Y V L P D M - - - - - V K - - - - - R G - - - - - A - - - - - G A V V N T A S I 145  
S L G \_ 2 0 0 4 0 / 1 - 2 5 8 75 T V A K H - G R I - D G F F N - - - - - N A G V - E G - V - - - - - I T P I H E - - - - - Y P I D E Y D R I L A V N L R G V F L G - - L R F V L V Q M - - - - - V A - - - - - Q G - - - - - S - - - - - G A V V N T A S I 142  
g|146275686|Nara/1-245 70 - - A P F - E R I - D V L V N - - - - - N A G I - T T - - - - - L G S V E E - - - - - I T L D Q F R H E L D I D V L G V F M G - - I Q A T L P R M - - - - - K T - - - - - H - - - - - G - - - - - G S I I N M S S L 133  
g|334342862|Sphch/1-257 79 A R E T M - G G L - S V L V N - - - - - N A G I - V V - - - - - T G S V E E - - - - - L S L D D W H R G M A I N N D S V F L G - - S K Y A L P L L - - - - - R E - - - - - N Q - - - - - P - - - - - A S I V N L S S I 145  
g|87198897|1-259 79 A A E K L - G G L - S V L V N - - - - - N A G V - G V - - - - - R G N I E T - - - - - C T L E W H R G F A I N V D S V F L G - - G Q A L P L L - - - - - R D - - - - - S Q - - - - - P - - - - - A S I V N I S S I 145  
g|146275698|Nara/1-254 79 I E A E D - G K L - D V L V N - - - - - N A G I - A V - - - - - L R P I A E - - - - - M T T A D W N L Q N S V N L D S V F Q G - - T K R A V V L M - - - - - R K - - - - - T G - - - - - T - - - - - K - - - - - G S I I N I S S I 146  
g|334343337|Sphch/1-258 73 A E E S W - G R L - D I L I N - - - - - N A G I - S M - - - - - F G L V T D - - - - - L T Y A Q W R R C I E V D L D S V F L G - - T R A A I P L M - - - - - R R - - - - - S G - - - - - G - - - - - G A I V N I S S M 139  
g|146275892|Nara/1-259 74 V E A A L - G P V - D V L V N - - - - - N A G I - L M - - - - - F K S L L E - - - - - T T K A D E Y K V L G V N L V G E F L G - - I K A V A P G M - - - - - I A - - - - - R G - - - - - K - - - - - G S I V N I S S V 140  
g|334342592|Sphch/1-246 74 A I A E F - G R L - N V L V N - - - - - N A G I - C T - - - - - M G S I E E - - - - - F T L A D W N R I I N I N L T G Q F L G - - I R A A T A A L - - - - - V Q - - - - - S A - - - - - P - - - - - S S I I N I S S T 140  
g|334342962|Sphch/1-244 74 C I D R F - G R L - D I L V N - - - - - N A G V - G G - - - - - G A E L A D - - - - - T S D Q Q W E R Q I A V N L G G V F L G - - M R A C I P H M - - - - - A K - - - - - N G - - - - - G - - - - - G S V I N I S S I 140  
g|334342992|Sphch/1-245 74 A A E L F - G G V - D I L V N - - - - - N A G Y - Y K - - - - - P L S L L D - - - - - S H S E E F G R H V E I N D K G T F L G - - M Q A V V A P M - - - - - R A - - - - - A G - - - - - G - - - - - G A V V N I A S V 140  
g|334342994|Sphch/1-245 74 A M R A F - G R I - D I L V N - - - - - D A G Y - Y R - - - - - A T P L Q D - - - - - A T V E E F Q R H V E V N Q L G V F L G - - M Q A V V A P M - - - - - R A - - - - - A G - - - - - G - - - - - G A I V N I S S T 140  
g|334342590|Sphch/1-248 74 A L A A F - G K I - D I L V N - - - - - N A G I - L G - P - - - - - M A N T V D - - - - - L T E E G Y H L V C A I N Q H A V F Y G - - M Q A V L P A M - - - - - V K - - - - - A N - - - - - K - - - - - G S I V N I S S I 141  
g|87198536|1-248 74 A V R E F - G T I - D I L V N - - - - - N A G I - L G - P - - - - - M A P T D S - - - - - L D D E G Y R K V C A V N Q D S V F F G - - M R A V L P V M - - - - - V K - - - - - A R - - - - - R - - - - - G S I V N I S S I 141  
g|1708836|2,5-DDOL\_Sjap/1-250 78 A V D G F - G G L - T T L S N - - - - - T A G I - I H - - - - - P G G F E E - - - - - E S I E G W N K M V A V N Q T A I F L G - - I K A A I P E L - - - - - V K - - - - - S G - - - - - N - - - - - G S I I N I S S L 144  
g|62286565|CPNA\_COMS9/1-250 77 I L A E S - D R L - D A L V N - - - - - N A G I - L T - - - - - L K P V Q D - - - - - T S N E E W D R I F E I N V R S V F L G - - T R A V I E P M - - - - - R K - - - - - A H - - - - - K - - - - - G C I V N V S S I 143  
g|33112056|R-specificADH/1-252 77 T E E A F - G P V - T T V V N - - - - - N A G I - A V - - - - - S K S V D - - - - - T T T E E W R K L L S V N L D G V F F G - - T R L G I Q R M - - - - - K N - - - - - K G - - - - - L - - - - - A S I I N M S S I 144  
g|146275770|Nara/1-271 81 V K E R H - G K C - H V L V N - - - - - N A G I - D L - - - - - T G P V E T - - - - - L S M E G W R R I M S I N V D G V F L G - - T K H F V P L M - - - - - A E - - - - - S G - - - - - K D F R G G - - - - - S S I I N V S S I 152  
g|334342841|Sphch/1-255 70 A Q E E A - G G L - D I L V N - - - - - N A G I - L I - - - - - T S P L K E - - - - - T S L E D W R R V Q S V N V E G V F L G - - C K Y A V P L I - - - - - A E - - - - - R A - - - - - A R W A G G - - - - - G S I I N M S S I 141  
g|334343813|Sphch/1-269 76 A A A W L - G G I - D I L V N - - - - - N A G I - A I - - - - - P G T V I Q - - - - - L D P A N W R K I F A V D V D S I F Y A - - S R I A I P I M - - - - - I A - - - - - A G - - - - - G - - - - - G A V V N I A S I 142  
g|87200879|1-249 74 A V A A N - G P I - D G L F L - - - - - N A G I - G G - M - - - - - F A P V E D - - - - - Y G D E A F D A V L A V N L K S V F W A - - I Q H A L P A M - - - - - K E - - - - - R G - - - - - Q - - - - - G A I L V T G S L 141  
S G 6 1 \_ 3 3 4 4 / 1 - 2 4 8 73 A A A H F - G P I - E G L F A - - - - - N A G L - T G - G - - - - - F T P A V S - - - - - F D P D V F E Q T I K V N L T S V F W A - - I Q K V L P A M - - - - - I E - - - - - A N - - - - - K - - - - - G A I L V T G S M 140  
S L G \_ 1 2 6 9 0 / 1 - 2 4 9 74 A A D R F - G P A - Y G L F A - - - - - N A G L - A G - N - - - - - F A P A L D - - - - - Y P G E L F E D V L R V N L T S V F W A - - M Q A V L P A M - - - - - I A - - - - - A G - - - - - E - - - - - G S I L V T G S M 141  
g|146275758|Nara/1-253 78 T L R L F - G R L - D T L V N - - - - - N A G L - V R - - - - - F G T V E D - - - - - L S W D D Y K L T D V M A G G T F L G - - C K A A I P H M - - - - - S K - - - - - D G - - - - - S - - - - - G S I I N M A S V 144  
g|729773326|steA\_Ctestosteroni/1-243 73 I R E K L - G T V - D V L V N - - - - - N A G V - G S - - - - - V D Q F A D - - - - - I P D A T W E R V I G V N L N G A F Y C - - A R A A V K Q M - - - - - Q E - - - - - G K - - - - - G - - - - - G A I V N I S S T 139  
g|146275834|Nara/1-267 72 V A A R L - G G V - D I L V N - - - - - N A G I - G S A P G D G M A E Y Y A G Q A A Q A G G D A S A - - Y A D Q T I H - - - - - C T D D G W S R V L S V T L D G A F R C - - S R A A V R I M - - - - - A E - - - - - Q G T - - - - - G - - - - - G A I V N I G S T 163  
P P \_ 1 9 5 3 / 1 - 2 6 9 72 V D A K F - G R V - D V I I N - - - - - A A G I - N A P T R E A N Q K M V D A N V A A L D A M K S G R A P T F D F L A D - - - - - T S D Q D F R R V M E V N L F S Q F Y C - - I R E G V P L M - - - - - R R - - - - - A G - - - - - G - - - - - G S I V N I S S V 165  
g|39647578|badH\_Rpalustris/1-255 77 T T T T L - G P V - D I L V N - - - - - N A G W - D I - - - - - F K P F T K - - - - - T E P G E W E R L I A I N L T G A L H M - - H H A V L P G M - - - - - V E - - - - - R R - - - - - H - - - - - G R I V N I A S D 143  
g|334342959|Sphch/1-250 74 M I D W T - G Q L - D T V V N - - - - - A A G M - W F - - - - - G G T V L D - - - - - V D P D Q W R R V L E V N T T G A Y L L - - A R A A L P R L - - - - - K E - - - - - T - - - - - N - - - - - G S I I N I A S V 139  
g|334342606|Sphch/1-251 78 T V A A L - G R I - D I L V N - - - - - N A G I - I R - - - - - R A D L P V - - - - - F S E E D W D A V V D T N L K T L F F L - - S Q A A A R P M - - - - - A A - - - - - Q G - - - - - A - - - - - G K I V N I A S L 144  
g|146275741|Nara/1-255 77 V L S S L - G G L - D I L V N - - - - - N A G I - I R - - - - - R A D A V D - - - - - F T E E D W D A V V D T N L K S V F F L - - S Q A A G R H M - - - - - I A - - - - - N R - - - - - E A T G R R G K I I N I A S M 148  
g|1730032|kduD\_Ecolik12/1-253 79 A V A E F - G H I - D I L V N - - - - - N A G L - I R - - - - - R E D A L E - - - - - F S E K D W D D V M N L I K S V F F M - - S Q A A A K H F - - - - - I A - - - - - Q G - - - - - N - - - - - G - - - - - G K I I N I A S M 146  
g|334343307|Sphch/1-251 76 V E P L L - A E V - D I L V N - - - - - N A G V - A A - - - - - D K P F L L - - - - - Q S E E D W D R V L D T N A K G M F L L - - S Q S A A R A M - - - - - K A - - - - - H G - - - - - R - - - - - G - - - - - G S I I N I A S I 143  
P P \_ 2 7 9 4 / 1 - 2 5 5 84 A - - - - - G P L - D V L V N - - - - - N A G V - S D - - - - - S Q P L L A - - - - - C Q D D T W D H V L D T N L K G A W A V - - A Q E S A R R M - - - - - V V - - - - - A G - - - - - K - - - - - G - - - - - G S I I N V T S I 147  
g|16330475|3-ketoacyl-ACP/1-240 69 I T D K L - G P V - Y G V V A - - - - - N A G I - T K - - - - - D N F F P K - - - - - L T P A D W D A V L N V N L K G V A Y S - - I K P F I E G M - - - - - Y E - - - - - R K - - - - - A - - - - - G S I V A I S S I 135  
g|334342640|Sphch/1-240 69 V A E A L - G P I - D V V V N - - - - - N A G I - T R - - - - - D G V L A K - - - - - M S F D D W N E V M R I N L G G C F N M - - A K A T F G G M - - - - - R E - - - - - R G - - - - - W - - - - - G R F V N I G S I 135  
S L G \_ 3 8 7 3 0 / 1 - 2 4 0 69 V A E D L - G P I - D V L V N - - - - - N A G I - T R - - - - - D N V M L K - - - - - M S F E E W N E V I R I N L G G C F N M - - A K A V F P G M - - - - - R E - - - - - R G - - - - - W - - - - - G R I V N I G S I 135  
g|87201224|1-240 69 V A A E V - G P I - D I V V N - - - - - N A G I - T R - - - - - D G V L H K - - - - - M S F D D W N E V M R I N L G G C F N M - - A K A T F S G M - - - - - R E - - - - - R G - - - - - W - - - - - G R I V N I G S I 135  
S G 6 1 \_ 9 0 7 / 1 - 2 4 0 69 V A A E V - G P I - E I V V N - - - - - N A G I - T R - - - - - D A T L H K - - - - - M S F D D W N E V M R I N L G G C F N M - - A K A C F P G M - - - - - R E - - - - - R G - - - - - W - - - - - G R I V N I G S I 135  
g|518742570|acetyl-CoA/1-246 75 V K A E V - G E V - D V L V N - - - - - N A G I - T R - - - - - D V V F R K - - - - - M T H E D W T A V I D T N L T S L F N V - - T K Q V I D G M - - - - - V E - - - - - R G - - - - - F - - - - - G R I I N I S S V 141  
g|334343976|Sphch/1-246 74 A V E A L G G K I - D I L V N - - - - - N A G I - T R - - - - - D N L I L R - - - - - M K D E E W S D V I S V N L E A A F R L - - A R A A A K P M - - - - - M K - - - - - A R - - - - - F - - - - - G R I I S I T S V 141  
g|87199449|1-254 82 A L D T L - G K L - D I L V N - - - - - N A G I - T R - - - - - D N L A M R - - - - - M K D E E W D A V I R V N L E A A F R L - - M R A A T K P M - - - - - M K - - - - - A R - - - - - F - - - - - G R I V T I T S V 148  
S G 6 1 \_ 1 2 0 3 / 1 - 2 5 0 78 T V D T L - G K I - D I L V N - - - - - N A G I - T R - - - - - D N L A M R - - - - - M K D E E W D Q V I R I N L E A A F R L - - M R A S C K P M - - - - - M K - - - - - A R - - - - - F - - - - - G R I I T I T S V 144  
g|388477173|fabG\_Ecolik1-244 73 I R A E F - G E V - D I L V N - - - - - N A G I - T R - - - - - D N L L M R - - - - - M K D E E W N D I I E T N L S S V F R L - - S K A V M R A M - - - - - M K - - - - - K R - - - - - H - - - - - G R I I T I G S V 139  
g|146318879|gluconate/1-271 85 I E S E V - G I I - D I L V N - - - - - N A G I - I R - - - - - R V P M I E - - - - - M T A A Q F R Q V I D I D L N A P F I V - - S K A V I P S M - - - - - I K - - - - - K G - - - - - H - - - - - G K I I N I C S M 151  
P P \_ 2 7 8 3 / 1 - 2 4 5 75 V E Q R F - E R I - D L L V N - - - - - N A G I - T R - - - - - G L L A T - - - - - Q S L N D I T E V I Q T N L V G T L L C - - C Q Q V L P C M - - - - - M R - - - - - Q R - - - - - S - - - - - G C I V N L S S V 141  
g|334343549|Sphch/1-249 76 L E R E I - G P V - S I L V N - - - - - N A G V - I F - - - - - P G R I D D - - - - - P G A R E K W D R T L A I N V G G P F N M - - C R A F Y P Q L - - - - - R A - - - - - T - - - - - R - - - - - G A V I N L A S I 142  
g|334343458|Sphch/1-251 74 V D D R F - G G V - D I L I N - - - - - N A G V - T G - - - - - N R P T V D - - - - - I T D E E W R T M S I D L D G V F Y C - - S R E A G R A M - - - - - I G - - - - - R R - - - - - P - - - - - G V I V N I G S I 140  
g|87199578|part2/1-253 69 I A G Q L - G P V - T L L V N - - - - - N A G I - V E - P - - - - - M A K S A D - - - - - Q A L A D F R R T I D V N V K G T I H A - - S R A A A R Q M - - - - - I G - - - - - A G - - - - - G - - - - - G A I V N L S S I 136  
g|87199495|1-266 78 T A D H F - G G I - D V L H N - - - - - N A A I - H E - T D L T D - - - - - K T S I E D - - - - - L P E E I W D A V Y E V N L K A L W L T - - T R Y A V P W L - - - - - K L - - - - - S K - - - - - G - - - - - A A I V N V A S T 149  
P P \_ 3 9 2 6 / 1 - 2 5 5 82 I R E Q F - G R L - D V L V N - - - - - N A A T - N P - Q - - - - - F C N V L D - - - - - T D P G A F Q K T V D V N I R G Y F F M - - S V E A G K L M - - - - - R E - - - - - N G - - - - - G - - - - - G S I I N V A S I 149  
g|334343112|Sphch/1-262 80 L N A E G - P A I - D I L V N - - - - - N G A I - G G - - - - - W G P L H D - - - - - S T L G Q W E N M F D V N V S S M Y L L - - C R D L S K G M - - - - - A A - - - - - R K - - - - - W - - - - - G R I I N F A S Y 146  
P P \_ 1 8 5 2 / 1 - 2 4 9 81 T E K A L - G R L - D I L V N - - - - - N A G V - L A - - - - - V A P V T E - - - - - F D L A D F D H M L A V N V R S V F V A - - S Q A A A R Y M - - - - - G Q - - - - - G - - - - - G R I I N I G S T 145  
S G 6 1 \_ 1 4 1 9 / 1 - 2 4 9 81 T A D H F - G G L - D I L V N - - - - - N A G G - G T - - - - - P E L I G E - - - - - A T L A N Y E H I F A V H V R A A F V A - - M N E A A K I M - - - - - P A - - - - - G - - - - - G R I I T I G S I 145  
S L G \_ 1 2 1 3 0 / 1 - 2 4 4 75 V E E A - G P L - R V L V Y - - - - - N G G I T G A - - - - - A S R L A D - - - - - A D P E T L A R V V A V N L T G A M L C - - A R A A I P L M S T R T G G Q - - - - - G - - - - - G - - - - - G A I V F M S S R 144  
g|649014081|glucose-1-dehydrogenase\_Bsub/1-261 79 A I K E F - G T L - D I M I N - - - - - N A G L - E N - - - - - P V P S H E - - - - - M P L K D W D K V I G T N L T G A F L G - - S R E A I K Y F - - - - - V E - - - - - N D - - - - - I - - - - - K - - - - - G N V I N M S S V 146  
g|146275833|Nara/1-261 77 V A A R H - G R L - D M L V N - - - - - N A M S - V H - - - - - Y A P I A K - - - - - L R L D H W R K D F A V N A D A V F V G - - T K A A M K V M - - - - - A A - - - - - Q E - - - - - Q R G R Q R - - - - - G A I V N I A S T 148  
g|87199577|1-257 83 A A A R F - G K I - D V L V N - - - - - N A M W - N S - - - - - Y D L I A D - - - - - I T P E I F A R M T G V G L G G I V W G - - I Q A V L P H M - - - - - P E - - - - - S - - - - - G - - - - - G A I V N I G S M 148  
S G 6 1 \_ 3 7 2 6 / 1 - 2 4 9 76 F R Y D A - G P L - R A V I N - - - - - N A S V - L V - - - - - Y E P I E D - - - - - V T E E T L E L M S A G L K S V F W G - - V Q A F L A Y R - - - - - D E - - - - - E A - - - - - S - - - - - G N I L N Y S S P 142  
S L G \_ 2 0 0 8 0 / 1 - 2 5 3 79 F A R A Y - G P V - D T L I N - - - - - N A S Y - L V - - - - - Y E P I E R - - - - - V T E E T L D R M I S S G L K S V F W G - - V Q A F L A H R - - - - - D - P E - - - - - A G - - - - - K - - - - - G W I N Y S S P 146  
g|33434277|Sphch/1-253 75 A V A K W - G R I - D V L F C - - - - - N A G N - S G - P - - - - - I G G I E D - - - - - Y P E D A M D A Y R V H V R G S F L G - - A K H A L P H M - - - - - D K - - - - - G - - - - - G S I I V M S S V 140  
g|512125550|n-pentylphenylADH\_Ralstonia/1-251 76 V R E Q R - G S I - D V L F A - - - - - N S G A - I E - - - - - Q K T L E E - - - - - I T P E H Y D R T F D V N V R G L I F T - - V Q K A L P L L - - - - - R D - - - - - G - - - - - G S V I L T S S V 140  
g|87200895|1-246 71 I E D A L - G G I - D V L F V - - - - - N A G V - G G - - - - - F A M V P D - - - - - V T P E F W D Q I H S V N L R G A F F A - - I Q R A L P L M - - - - - R D - - - - - G - - - - - G S I V I T G S I 135  
S G 6 1 \_ 3 1 9 1 / 1 - 2 4 9 72 I G A S D - G R I - D V L Y I - - - - - N A G V - G G - - - - - F A P L R D - - - - - I T S E A W D H T S I N L K G C V F A - - L Q A V R I M - - - - - G K - - - - - G - - - - - G S V V T G S I 136  
S L G \_ 0 7 1 8 0 / 1 - 2 4 8 72 I R E A H - G R L - D I L F V - - - - - N A G I - G T - - - - - F A P V A E - - - - - V T P A Q W D E V H N V N L R G C F F A - - V Q E A L P L M - - - - - G K - - - - - G - - - - - G A I V I T G S I 136  
g|87199020|1-282 73 A G T E T - G G I - D T V F N - - - - - N A G A - G G - D - - - - - R A P I D E - - - - - I E P E G W D R T M D L L L R S V A F G - - I R Y A V P H M - - - - - K G - - - - - R H - - - - - G - - - - - A S F V N T S S V 140  
g|334343475|Sphch/1-279 103 A L S A F - G R I - D L L H S - - - - - N A G I - I G - E - - - - - P G P I A G - - - - - A S A A N F D R V F S V N V R S A V L M - - I G A V P E M - - - - - R R - - - - - Q G - - - - - G - - - - - G S I V I T A S V 170  
g|81821161|PED\_AROAE/1-249 76 V I S T F - G R C - D I L V N - - - - - N A G I - Y P - - - - - L I P F D E - - - - - L T F E Q W K K T F E I N V D S G F L M - - A K A F V P G M - - - - - K R - - - - - N G - - - - - W - - - - - G R I I N L T S T 142  
S L G \_ 1 8 8 9 0 / 1 - 2 4 9 75 T A E A F - G P A - H I L V N - - - - - N A G L - H P - S - - - - - P M P F E E - - - - - L G F D Y W R R T M S V N L D A M F L T - - I Q A F L P Q L - - - - - K Q - - - - - N S - - - - - W - - - - - G R I V N F S A 142  
S L G \_ 1 8 5 9 0 / 1 - 2 5 1 74 L D K E M - G G V - D V L V N - - - - - N A G V - Y S - - - - - F T P H E T - - - - - V T I D V W R K I M S L N L D G M F L L - - T Q A V L P G M - - - - - K A - - - - - K G - - - - - W - - - - - G R I I N V A S N 140  
g|167033792|bdh/1-256 74 A E G Q F - G G V - D I L V N - - - - - N A G I - Q H - - - - - V A P V E Q - - - - - F P T E S W D K I I A L N L S A V F H G - - T R L A L P G M - - - - - R T - - - - - R N - - - - - W - - - - - G R I I N I A S V 140  
P P \_ 3 0 7 3 / 1 - 2 5 6 74 A E R E F - G G V - D I L V N - - - - - N A G I - Q H - - - - - V A P V E Q - - - - - F P P E S W D K I I A L N L S A V F H G - - T R L A L P G M - - - - - R T - - - - - R N - - - - - W - - - - - G R I I N I A S V 140

gj|84570596|bdh2\_Rpickett/1-256  
 gj|33434517|1|Sphch/1-263  
 SLG\_32730/1-261  
 gj|87199767/1-261  
 SG61\_1243/1-257  
 gj|84570594|bdh1\_Rpickett/1-260  
 gj|33434246|1|Sphch/1-265  
 gj|334343092|1|Sphch/1-255  
 gj|334343456|1|Sphch/1-245  
 gj|334343408|1|Sphch/1-258  
 gj|146275993|Nara/1-256  
 gj|146275997|Nara/1-246  
 gj|87199890/1-279  
 SG61\_474/1-283  
 SLG\_24920/1-278  
 PP\_1951/1-275  
 PP\_2002/1-257  
 SLG\_15310/1-259  
 gj|146275988|Nara/1-261  
 SG61\_609/1-245  
 gj|146275674|Nara/1-255  
 gj|334343001|1|Sphch/1-254  
 gj|334343319|1|Sphch/1-259  
 gj|87199902/1-261  
 SG61\_354/1-260  
 PP\_2214/1-255  
 SG61\_3175/1-254  
 gj|146276032|Nara/1-246  
 gj|334342802|1|Sphch/1-249  
 PP\_1708/1-252  
 SLG\_05090/1-250  
 SG61\_2863/1-244  
 SLG\_35070/1-243  
 gj|146275941|Nara/1-266  
 gj|334343077|1|Sphch/1-254  
 gj|334342781|1|Sphch/1-260  
 SLG\_31530/1-250  
 SG61\_2583/1-255  
 PP\_2175/1-234  
 PP\_0488/1-253  
 gj|2506152|YDFG\_ECOLI/1-248  
 gj|334345036|1|Sphch/1-249  
 PP\_4862/1-254  
 gj|334346119|1|Sphch/1-241  
 SLG\_33310/1-241  
 gj|334342779|1|Sphch/1-273  
 gj|334342815|1|Sphch/1-290  
 gj|87198230/1-306  
 SLG\_08640/1-305  
 SLG\_35880/1-297  
 gj|87198815/1-310  
 SG61\_724/1-305  
 gj|8719892/1-280  
 SG61\_2550/1-291  
 SLG\_33660/1-289  
 SLG\_07240/1-277  
 gj|87198816/1-310  
 SG61\_2705/1-303  
 SG61\_1498/1-309  
 SLG\_35900/1-311  
 gj|87198727/1-305  
 SG61\_3329/1-309  
 SLG\_12640/1-304  
 SG61\_2549/1-315  
 SLG\_28340/1-294  
 SG61\_2706/1-296  
 PP\_1745/1-269  
 gj|334342965|1|Sphch/1-259  
 gj|87199139/1-266  
 SG61\_504/1-269  
 SG61\_782/1-273  
 SLG\_38070/1-265  
 SLG\_27950/1-266  
 gj|87200928/1-272  
 gj|146275769|Nara/1-259  
 gj|146275845|Nara/1-289  
 4BMV:AlPDBID|n-pentyl/1-262  
 PP\_2989/1-264  
 SLG\_18780/1-267  
 PP\_0429/1-260  
 gj|334343146|1|Sphch/1-268  
 gj|334343373|1|Sphch/1-250  
 SG61\_417/1-252

|    |       |      |        |        |        |         |            |        |        |       |        |        |      |     |     |         |        |        |     |     |    |      |     |    |     |     |     |     |     |     |     |     |     |    |     |   |    |     |     |    |     |     |    |    |    |    |    |     |    |     |     |     |     |     |     |    |   |     |    |    |     |   |     |   |   |   |   |     |   |     |
|----|-------|------|--------|--------|--------|---------|------------|--------|--------|-------|--------|--------|------|-----|-----|---------|--------|--------|-----|-----|----|------|-----|----|-----|-----|-----|-----|-----|-----|-----|-----|-----|----|-----|---|----|-----|-----|----|-----|-----|----|----|----|----|----|-----|----|-----|-----|-----|-----|-----|-----|----|---|-----|----|----|-----|---|-----|---|---|---|---|-----|---|-----|
| 75 | AEAEF | -AA  | -DILVN | -NAGI  | -QH    | VASIED  | FPPERWDA   | IA     | AINLTS | SAFHT | -TRLAL | PGM    | -RQ  | -KN | -W  | -GRVINI | AST    | 140    |     |     |    |      |     |    |     |     |     |     |     |     |     |     |     |    |     |   |    |     |     |    |     |     |    |    |    |    |    |     |    |     |     |     |     |     |     |    |   |     |    |    |     |   |     |   |   |   |   |     |   |     |
| 80 | AADF  | -GGV | -DILIN | -NAGM  | -QH    | VAPVEE  | FPVDKWNL   | IA     | ALNLNS | SAFHT | -SRLA  | IPYM   | -KQ  | -KK | -W  | -GRI    | IQTASA | 146    |     |     |    |      |     |    |     |     |     |     |     |     |     |     |     |    |     |   |    |     |     |    |     |     |    |    |    |    |    |     |    |     |     |     |     |     |     |    |   |     |    |    |     |   |     |   |   |   |   |     |   |     |
| 78 | AAETF | -GGV | -DILVN | -NAGT  | -QH    | VAPVES  | FPVDKWNL   | IA     | ALNLTS | SAFHT | -TRLA  | VPYM   | -KE  | -KK | -W  | -GRI    | IQTASA | 144    |     |     |    |      |     |    |     |     |     |     |     |     |     |     |     |    |     |   |    |     |     |    |     |     |    |    |    |    |    |     |    |     |     |     |     |     |     |    |   |     |    |    |     |   |     |   |   |   |   |     |   |     |
| 78 | ALAEF | -GAV | -DILIN | -NAGM  | -QH    | VAPVEE  | FPVEKWDA   | IA     | ALNLTS | AFDA  | -CRLA  | IPGM   | -KA  | -KG | -W  | -GRI    | IFTASA | 144    |     |     |    |      |     |    |     |     |     |     |     |     |     |     |     |    |     |   |    |     |     |    |     |     |    |    |    |    |    |     |    |     |     |     |     |     |     |    |   |     |    |    |     |   |     |   |   |   |   |     |   |     |
| 78 | A     | -GPV | -DILVN | -NAGM  | -QH    | VSPVDE  | FPPEKWDA   | IA     | ALNLTA | AFDT  | -SRLA  | IPHM   | -KA  | -AG | -W  | -GRI    | INTASA | 140    |     |     |    |      |     |    |     |     |     |     |     |     |     |     |     |    |     |   |    |     |     |    |     |     |    |    |    |    |    |     |    |     |     |     |     |     |     |    |   |     |    |    |     |   |     |   |   |   |   |     |   |     |
| 76 | VAQAF | -GNI | -DILVS | -NAGI  | -QI    | VNP IQN | YAFSDWKMQA | I      | HVDGAF | FLT   | -TKAAL | KYM    | -Y   | -RD | -G  | -GTV    | IYMGSV | 143    |     |     |    |      |     |    |     |     |     |     |     |     |     |     |     |    |     |   |    |     |     |    |     |     |    |    |    |    |    |     |    |     |     |     |     |     |     |    |   |     |    |    |     |   |     |   |   |   |   |     |   |     |
| 82 | TEEAL | -GPV | -HILIN | -NAVV  | -RH    | FARIED  | FPIEKWTEAL | AVNVT  | AFLA   | -TQMV | LPGM   | -RA    | -AH  | -Y  | -G  | -GRV    | NMTSV  | 148    |     |     |    |      |     |    |     |     |     |     |     |     |     |     |     |    |     |   |    |     |     |    |     |     |    |    |    |    |    |     |    |     |     |     |     |     |     |    |   |     |    |    |     |   |     |   |   |   |   |     |   |     |
| 80 | ANEAH | -GPI | -AHAFN | -NIGM  | -SR    | PGSIEE  | MSLEDWNWT  | IG     | ISLT   | STFLA | -MKYE  | IPVM   | -KA  | -NG | -G  | -GT     | VNTASM | 146    |     |     |    |      |     |    |     |     |     |     |     |     |     |     |     |    |     |   |    |     |     |    |     |     |    |    |    |    |    |     |    |     |     |     |     |     |     |    |   |     |    |    |     |   |     |   |   |   |   |     |   |     |
| 77 | CQDRF | -GGL | -DFLVP | -SAGI  | -YV    | DQSFD   | MRFDQWRQ   | TMSV   | NLDG   | IFLI  | -TRAA  | I PAL  | -RK  | -G  | -GA | I       | VLSSM  | 141    |     |     |    |      |     |    |     |     |     |     |     |     |     |     |     |    |     |   |    |     |     |    |     |     |    |    |    |    |    |     |    |     |     |     |     |     |     |    |   |     |    |    |     |   |     |   |   |   |   |     |   |     |
| 85 | VEEAM | -GMV | -TILVN | -NAGM  | -PD    | AQLATR  | MPLDL      | IDQV   | IGVNL  | RGFIL | -AREV  | AKRL   | -I   | -EA | -P  | -GRI    | INVASM | 152    |     |     |    |      |     |    |     |     |     |     |     |     |     |     |     |    |     |   |    |     |     |    |     |     |    |    |    |    |    |     |    |     |     |     |     |     |     |    |   |     |    |    |     |   |     |   |   |   |   |     |   |     |
| 75 | VMANA | -GQL | -DVAF  | -NAGF  | -YG    | AEGLD   | VDEAL      | FDRLVA | INL    | KGAF  | NG     | -IKAV  | QAVI | -A  | -T  | -G      | -GAV   | VNTASA | 140 |     |    |      |     |    |     |     |     |     |     |     |     |     |     |    |     |   |    |     |     |    |     |     |    |    |    |    |    |     |    |     |     |     |     |     |     |    |   |     |    |    |     |   |     |   |   |   |   |     |   |     |
| 73 | GAR   | -NGL | -DVLN  | -ISGV  | -LK    | WGRSD   | FSLED      | DFL    | VMRV   | NTHS  | VFTL   | -CQAAL | PHL  | -VE | -S  | -K      | -GRI   | VNTASA | 136 |     |    |      |     |    |     |     |     |     |     |     |     |     |     |    |     |   |    |     |     |    |     |     |    |    |    |    |    |     |    |     |     |     |     |     |     |    |   |     |    |    |     |   |     |   |   |   |   |     |   |     |
| 82 | HDKAY | -GGL | -DICFA | -NAGI  | -DTGAG | F-W     | NPAGHRNPE  | GGVDT  | YDHR   | KR    | WDRS   | IQ     | INL  | NGV | FYT | -V      | SN     | VR     | IM  | -K  | KE | GRA  | -NG | R  | T   | -G  | -GS | V   | T   | ASN | 167 |     |     |    |     |   |    |     |     |    |     |     |    |    |    |    |    |     |    |     |     |     |     |     |     |    |   |     |    |    |     |   |     |   |   |   |   |     |   |     |
| 82 | HAAAY | -NGC | -DIAFA | -NAGL  | -DVGNG | F-W     | TPEGKRN    | PDGQ   | IDV    | YE    | PER    | WYK    | IG   | INL | NGV | FHT     | -V     | RE     | AAR | VM  | -K | NEAL | -S  | GR | -G  | -GS | I   | V   | T   | SSN | 167 |     |     |    |     |   |    |     |     |    |     |     |    |    |    |    |    |     |    |     |     |     |     |     |     |    |   |     |    |    |     |   |     |   |   |   |   |     |   |     |
| 87 | HEAAY | -GGL | -DIAFA | -NAGV  | -DIPG  | PFAAL   | DPNGHRA    | PDGQ   | VD     | YEP   | EY     | WDR    | IA   | INL | TG  | AYNT    | -M     | R      | DA  | VR  | LM | -K   | K   | -G | -GS | I   | A   | T   | SSN | 167 |     |     |     |    |     |   |    |     |     |    |     |     |    |    |    |    |    |     |    |     |     |     |     |     |     |    |   |     |    |    |     |   |     |   |   |   |   |     |   |     |
| 82 | VAGG  | -GGL | -DIVFA | -NAGI  | -DIPG  | PFAAL   | NAAGERE    | PAN    | MLEE   | Y     | SD     | HR     | WR   | KV  | IV  | S       | LD     | DA     | V   | FYS | -I | R    | A   | AR | H   | M   | -S  | -GS | I   | V   | T   | TSV | 163 |    |     |   |    |     |     |    |     |     |    |    |    |    |    |     |    |     |     |     |     |     |     |    |   |     |    |    |     |   |     |   |   |   |   |     |   |     |
| 81 | VLGQF | -GRL | -DALVC | -NAAI  | -AN    | -PH     | NQTLES     | LSL    | AQ     | WN    | RV     | L      | GV   | N   | L   | S       | G      | P      | M   | L   | -A | K    | H   | C  | A   | P   | Y   | -N  | -G  | -G  | A   | I   | V   | N  | L   | T | ST | 148 |     |    |     |     |    |    |    |    |    |     |    |     |     |     |     |     |     |    |   |     |    |    |     |   |     |   |   |   |   |     |   |     |
| 82 | FGERE | -GKL | -DILVN | -NAGT  | -GG    | NGPIET  | VDI        | PD     | WNA    | AME   | VNL    | R      | APF  | LL  | -VQ | QAL     | P      | L      | -R  | -A  | A  | A    | P   | G  | -T  | -Y  | -AS | V   | I   | N   | L   | G   | S   | I  | 152 |   |    |     |     |    |     |     |    |    |    |    |    |     |    |     |     |     |     |     |     |    |   |     |    |    |     |   |     |   |   |   |   |     |   |     |
| 91 | ALEKL | -GKV | -DVLIN | -NAGL  | -GG    | EVDVDD  | MTDDQ      | WSR    | V      | DV    | T      | L      | T    | S   | L   | F       | R      | M      | -T  | R   | A  | F    | L   | P  | A   | M   | -Y  | -N  | -S  | -G  | -G  | V   | M   | V  | N   | N | A  | S   | 157 |    |     |     |    |    |    |    |    |     |    |     |     |     |     |     |     |    |   |     |    |    |     |   |     |   |   |   |   |     |   |     |
| 63 | LEPQI | -GRL | -DHAVV | -NAGI  | -AA    | GAPIAE  | ESFE       | Q      | W      | R     | I      | M      | S    | V   | N   | L       | D      | G      | A   | F   | L  | T    | -L  | A  | T   | A   | L   | R   | L   | -A  | -K  | -N  | -G  | -G | V   | V | L  | L   | S   | V  | 130 |     |    |    |    |    |    |     |    |     |     |     |     |     |     |    |   |     |    |    |     |   |     |   |   |   |   |     |   |     |
| 71 | AEAVN | -GKA | -RILVN | -CAGI  | -GP    | PAKVL   | N          | R      | D      | G     | S      | P      | -L   | P   | A   | D       | F      | A      | R   | I   | I  | N    | L   | L  | G   | T   | F   | N   | V   | -L  | S   | K   | F   | A  | S   | R | -H | D   | A   | E  | P   | L   | N  | E  | D  | G  | E  | -R  | -G | V   | I   | V   | N   | T   | A   | S  | V | 149 |    |    |     |   |     |   |   |   |   |     |   |     |
| 71 | AEALN | -GKA | -RILVN | -CAGI  | -GP    | PAKVI   | I          | R      | D      | G     | S      | P      | -L   | P   | N   | D       | F      | S      | K   | I   | V  | I    | N   | L  | I   | G   | S   | F   | N   | V   | -L  | S   | K   | F  | A   | A | R  | L   | -H  | D  | A   | E   | P  | V  | G  | G  | E  | -R  | -G | V   | I   | V   | N   | T   | A   | S  | V | 148 |    |    |     |   |     |   |   |   |   |     |   |     |
| 71 | AREAH | -GQE | -RILIN | -CAGT  | -GN    | A       | I          | K      | T      | A     | S      | R      | S    | K   | T   | T       | G      | E      | I   | Q   | H  | F    | L   | D  | A   | F   | E   | R   | I   | Q   | I   | N   | L   | I  | G   | T | F  | R   | C   | -I | A   | K   | S  | A  | A  | G  | M  | -L  | T  | L   | D   | P   | M   | E   | D   | -G | A | -R  | -G | V  | I   | V | N   | T | A | S | V | 153 |   |     |
| 72 | ARAAH | -GQE | -RILVN | -CAGT  | -GN    | A       | I          | K      | T      | A     | S      | R      | S    | K   | E   | T       | G      | E      | I   | K   | H  | F    | P   | M  | D   | A   | F   | N   | W   | I   | Q   | I   | N   | L  | V   | G | T  | F   | R   | C  | -I  | A   | K  | S  | A  | A  | G  | M   | -M | T   | L   | D   | P   | C   | D   | E  | F | G   | E  | -R | -G  | A | I   | V | N | T | A | S   | V | 155 |
| 72 | ARAAH | -GQE | -RILVN | -CAGI  | -GT    | IGK     | T          | R      | R      | D     | R      | E      | T    | G   | A   | I       | S      | H      | F   | P   | I  | A    | A   | F  | A   | K   | T   | E   | N   | V   | T   | G   | T   | F  | R   | C | -I | A   | K   | A  | A   | A   | G  | M  | -M | T  | L  | E   | P  | L   | N   | E   | -R  | -G  | A   | I  | V | N   | T  | A  | S   | V | 154 |   |   |   |   |     |   |     |
| 73 | AVSAF | -GSL | -HGLVN | -CAGI  | -VG    | AEK     | V          | L      | G      | K     | Q      | G      | P    | H   | G   | -L      | A      | S      | F   | A   | K  | I    | V   | N  | V   | N   | L   | I   | G   | S   | F   | N   | L   | -L | R   | L | A  | A   | A   | A  | M   | -A  | E  | G  | A  | A  | D  | E   | S  | -G  | E   | -R  | -G  | V   | I   | N  | T | A   | S  | I  | 149 |   |     |   |   |   |   |     |   |     |
| 65 | VIERH | -GRI | -DILLN | -NAGI  | -GG    | L       | G          | P      | V      | A     | T      | P      | E    | G   | P   | G       | D      | -M     | A   | A   | F  | R    | I   | I  | G   | V   | N   | L   | L   | G   | A   | T   | Q   | -V | A   | H | V  | A   | H   | R  | M   | -M  | A  | N  | E  | P  | S  | G   | P  | D   | G   | E   | -R  | -G  | V   | I  | V | N   | T  | C  | S   | I | 142 |   |   |   |   |     |   |     |
| 73 | MLDRW | -GVV | -HALVN | -NAVV  | -TR    | A       | P          | D      | D      | F     | S      | A      | V    | E   | N   | L       | R      | G      | T   | F   | V  | G    | -S  | Q  | V   | F   | R   | L   | F   | -K  | T   | -Y  | -G  | -R | I   | V | N  | I   | A   | S  | L   | 139 |    |    |    |    |    |     |    |     |     |     |     |     |     |    |   |     |    |    |     |   |     |   |   |   |   |     |   |     |
| 69 | VEQDL | -GDL | -TILV  | TAA    | G      | T       | A          | G      | T      | A     | G      | F      | L    | N   | G   | T       | M      | -P     | R   | -L  | Q  | -D   | -P  | S  | D   | H   | W   | D   | Q   | Y   | M   | N   | I   | N  | L   | R | G  | G   | F   | L  | A   | R   | E  | M  | L  | R  | R  | R   | M  | A   | -K  | P   | -H  | -A  | R   | I  | V | T   | I  | S  | S   | M | 142 |   |   |   |   |     |   |     |
| 76 | IEEVH | -GRL | -DVMFN | -NAGI  | -NA    | -P      | A          | V      | P      | V     | D      | -L     | P    | E   | N   | W       | R      | N      | V   | I   | A  | T    | N   | V  | D   | G   | V   | F   | L   | C   | -A  | R   | A   | A  | F   | G | L  | M   | -R  | -R | -Q  | -Q  | -P | -Q | -G | -G | R  | I   | N  | N   | G   | S   | I   | 145 |     |    |   |     |    |    |     |   |     |   |   |   |   |     |   |     |
| 74 | AVARF | -GRV | -DLLFN | -NAGL  | -NG    | -G      | R          | F      | P      | I     | E      | D      | -M   | V   | A   | L       | F      | R      | E   | V   | D  | V    | N   | L  | T   | G   | A   | F   | L   | C   | -L  | Q   | A   | A  | F   | R | V  | M   | -K  | A  | -Q  | -Q  | -P | -R | -G | -G | R  | I   | N  | N   | G   | S   | I   | 143 |     |    |   |     |    |    |     |   |     |   |   |   |   |     |   |     |
| 79 | AVDRF | -GTV | -DILIN | -NAGI  | -AD    | STP     | VY         | E      | -L     | S     | E      | M      | W    | H   | R   | V       | I      | E      | T   | N   | L  | S    | A   | F  | L   | C   | -S  | R   | E   | A   | F   | R   | I   | M  | -K  | D | -K | -G  | -H  | -G | R   | I   | N  | V  | G  | S  | I  | 145 |    |     |     |     |     |     |     |    |   |     |    |    |     |   |     |   |   |   |   |     |   |     |
| 77 | A     | -EAF | -SPV   | -TLLVA | -NAGM  | -AI     | H          | R      | P      | T     | V      | D      | -V   | T   | L   | E       | Q      | W      | R   | A   | V  | I    | D   | V  | N   | L   | T   | A   | A   | F   | L   | C   | -G  | R  | E   | A | L  | R   | V   | M  | -Q  | P   | -R | -G | -G | R  | I  | N   | V  | G   | S   | L   | 142 |     |     |    |   |     |    |    |     |   |     |   |   |   |   |     |   |     |
| 79 | CVERF | -GSV | -DILVN | -NAYR  | -GE    | -G      | P          | V      | R      | I     | E      | D      | -K   | T   | D   | E       | R      | F      | D   | E   | A  | L    | R   | M  | C   | L   | F   | A   | T   | K   | W   | A   | -M  | E  | R   | A | L  | P   | H   | M  | -K  | A   | -K | -G | -W | -G | R  | V   | I  | N   | M   | A   | S   | L   | 146 |    |   |     |    |    |     |   |     |   |   |   |   |     |   |     |
| 78 | TQAL  | -GPV | -WLLVN | -NAVS  | -TD    | N       | R          | P      | I      | E     | E      | -V     | D    | D   | A   | N       | L      | L      | R   | S   | S  | I    | H   | G  | S   | L   | Y   | M   | -M  | Q   | A   | C   | F   | P  | T   | M | -K | E   | -R  | -G | -G  | -G  | -R | I  | V  | A  | I  | M   | S  | S   | 143 |     |     |     |     |    |   |     |    |    |     |   |     |   |   |   |   |     |   |     |
| 78 | AAEQL | -GGL | -DGVPN | -IAGA  | -YP    | Y       | A          | P      | A      | D     | A      | -I     | P    | E   | A   | D       | W      | L      | L   | A   | V  | N    | V   | K  | G   | L   | H   | Y   | V   | -C  | A   | A   | F   | P  | H   | L | -K | E   | -A  | -G | -G  | -G  | -G | -V | I  | V  | N  | M   | A  | S   | D   | 144 |     |     |     |    |   |     |    |    |     |   |     |   |   |   |   |     |   |     |
| 68 | VDHQL | -GGL | -DVLVS | -NVGI  | -GG    | -P      | T          | L      | P      | A     | D      | -L     | P    | S   | E   | D       | W      | R      | R   | V   | I  | D    | I   | N  | L   | T   | A   | S   | F   | L   | C   | -T  | Q   | R  | A   | I | P  | L   | L   | -K | G   | -S  | -A | -G | -T | I  | -I | M   | S  | S   | 134 |     |     |     |     |    |   |     |    |    |     |   |     |   |   |   |   |     |   |     |
| 80 | TLAHF | -GEL | -DGIVS | -NAGF  | -AD    | R       | P          | F      | L      | N     | -V     | P      | R    | E   | R   | L       | D      | S      | S   | F   | S  | V    | M   | T  | G   | L   | F   | D   | -A  | R   | A   | A   | A   | P  | A   | L | -A | A   | -S  | G  | -R  | -G  | -R | I  | V  | A  | I  | S   | S  | 146 |     |     |     |     |     |    |   |     |    |    |     |   |     |   |   |   |   |     |   |     |
| 69 | VVEKW | -GRI | -DVLLN | -SAGH  | -GP    | R       | A          | P      | I      | L     | E      | -I     | S    | D   | E   | D       | W      | H      | K   | G   | M  | D    | T   | Y  | L   | L   | N   | V   | I   | R   | P   | -T  | R   | L  | V   | T | P  | Y   | M   | -Q | R   | -Q  | -G | -G | -V | I  | N  | I   | S  | T   | A   | 135 |     |     |     |    |   |     |    |    |     |   |     |   |   |   |   |     |   |     |
| 69 | MREAS | -LQI | -DLLVN | -NAGL  | -AL    | -G      | V          | D      | R      | A     | Q      | -S     | S    | A   | N   | W       | Q      | M      | I   | D   | T  | N    | I   | T  | G   | L   | A   | M   | V   | -T  | H   | K   | I   | L  | P   | Q | M  | -V  | E   | -A | -D  | -S  | -G | -M | I  | N  | I  | G   | S  | 136 |     |     |     |     |     |    |   |     |    |    |     |   |     |   |   |   |   |     |   |     |
| 68 | LPAEW | -CNI | -DILVN | -NAGL  | -AL    | -G      | M          | E      | P      | A     | H      | -A     | S    | V   | D   | E       | W      | E      | T   | M   | I  | D    | T   | N  | N   | K   | L   | V   | Y   | M   | -T  | R   | A   | V  | L   | P | G  | M   | -V  | E  | -R  | -N  | -H | -G | H  | I  | N  | I   | G  | S   | T   | 135 |     |     |     |    |   |     |    |    |     |   |     |   |   |   |   |     |   |     |
| 71 | LPADF | -AQI | -DILIN | -NAGL  | -AL    | -G      | T          | A      | P      | A     | Q      | W      | -A   | D   | L   | Q       | W      | R      | Q   | M   | I  | N    | T   | N  | I   | T   | G   | L   | V   | T   | I   | -T  | Q   | K  | L   | L | P  | R   | L   | -I | E   | -R  | -K | -G | -A | I  | N  | L   | S  | S   | 137 |     |     |     |     |    |   |     |    |    |     |   |     |   |   |   |   |     |   |     |
| 72 | LPAGF | -EKI | -RGLVN | -NAGL  | -AL    | -G      | V          | D      | A      | A     | Q      | -C     | S    | L   | D   | D       | W      | E      | T   | M   | V  | D    | T   | N  | I   | K   | L   | M   | Y   | T   | -T  | R   | L   | L  | P   | R | L  | -I  | A   | -H | -G  |     |    |    |    |    |    |     |    |     |     |     |     |     |     |    |   |     |    |    |     |   |     |   |   |   |   |     |   |     |



g|146275658|Naro/1-269  
g|334343486|Sphch/1-273  
g|146275875|Naro/1-252  
PP\_1946/1-262  
PP\_1871/1-253  
g|87200975/1-250  
SG61\_1215/1-250  
g|146275951|Naro/1-252  
SG61\_2016/1-248  
g|31615398|Levodione/1-267  
g|87200486/1-256  
SG61\_3730/1-262  
SLG\_20040/1-258  
g|146275686|Naro/1-245  
g|334342862|Sphch/1-257  
g|87198897/1-259  
g|146275698|Naro/1-254  
g|334343337|Sphch/1-258  
g|146275892|Naro/1-259  
g|334342592|Sphch/1-246  
g|334342962|Sphch/1-244  
g|334342992|Sphch/1-245  
g|334342994|Sphch/1-245  
g|334342590|Sphch/1-248  
g|87198536/1-248  
g|1708836|2,5-DDOL\_Sjap/1-250  
g|62286565|CPNA\_COMS9/1-250  
g|33112056|R-specificADH/1-252  
g|146275770|Naro/1-271  
g|334342841|Sphch/1-255  
g|334343813|Sphch/1-269  
g|87200879/1-249  
SG61\_3344/1-248  
SLG\_12690/1-249  
g|146275758|Naro/1-253  
g|729773326|steA\_Ctestosteroni/1-243  
g|146275834|Naro/1-267  
PP\_1953/1-269  
g|39647578|badH\_Rpalustris/1-255  
g|334342959|Sphch/1-250  
g|334342606|Sphch/1-251  
g|146275741|Naro/1-255  
g|1730032|kduD\_EcoliK12/1-253  
g|334343307|Sphch/1-251  
PP\_2794/1-255  
g|16330475|3-ketoacyl-ACP/1-240  
g|334342640|Sphch/1-240  
SLG\_38730/1-240  
g|87201224/1-240  
SG61\_907/1-240  
g|518742570|acetyl-CoA/1-246  
g|334343976|Sphch/1-246  
g|87199449/1-254  
SG61\_1203/1-250  
g|388477173|fabG\_Ecoli/1-244  
g|146318879|gluconate/1-271  
PP\_2783/1-245  
g|334343549|Sphch/1-249  
g|334343458|Sphch/1-251  
g|87199578|part2/1-253  
g|87199495/1-266  
PP\_3926/1-255  
g|334343112|Sphch/1-262  
PP\_1852/1-249  
SG61\_1419/1-249  
SLG\_12130/1-244  
g|64901408|glucose-1-dehydrogenase\_Bsub/1-261  
g|146275833|Naro/1-261  
g|87199577/1-257  
SG61\_3726/1-249  
SLG\_20080/1-253  
g|334342771|Sphch/1-253  
g|512125550|n-pentylphenylADH\_Ralstonia/1-251  
g|87200895/1-246  
SG61\_3191/1-249  
SLG\_07180/1-248  
g|87199020/1-282  
g|334343475|Sphch/1-279  
g|81821161|PED\_AROAE/1-249  
SLG\_18890/1-249  
SLG\_18590/1-251  
g|167033792|bdh/1-256  
PP\_3073/1-256

149 LALQ-GHLI-Q--AAYSSSKAAV IQMTRA I AASHGKA -G--VRCNAVAPGMTMTPI--L-REAF-----PPALRQV-----VE-D-ET--LR-DRLGD---P-RDIAEAIAFLAS--D-AAR---NVT 241  
150 MGLG-GEAW-Q--VSYGTSKAAV IQLTKRYVATHFGKQ -G--IRCNAIAPALVMTPI--V-ETAM-----HPQLQA-----HE-E-NC--LT-PYLGD---P-EDIAAAVAFLAS--D-DAR---YVT 242  
146 NGLV-GNGS-Q--PAYTAAKHGTVGLTRKHAALRWAKN -G--IRVNAVCPGV IETPM--T-APLV-----QNPRIKAL-----MD-S-MT--PM-GRMGS---A-MEIAEAVVWVLS--P-AAS---FVT 239  
148 SGLI-GGYR-L--SGYTATKHGVVGLTKAAAIDYANQ -N--IRINAVCPGPVDSFP--L-ADMP-----QPMRDR-----LL-F-GT--PI-GRLAT---A-EEIARSVLWLCS--D-DAK---YVY 239  
146 AGLG-AAPK-M--SIYSASKHAV IGLTKSAAIEYAKK -G--IRVNAVCPAV IETDM--F-RRAY-----QADPRKAEF-----AA-A-MH--PV-GRIGK---V-EEIASAVLYLCS--D-GAA---FTT 240  
144 GALI-ADPN-M--SAYCAMKHAVSGLTKAAAVEYAQA -G--IRVNAIAPGVVTPM--T-QHWA-----DSNEFTQM-----FF-A-QN--IS-GRAAR---P-EEIAPTVLHLCS--D-GAS---FIN 237  
144 GGLI-ADPN-M--AAYCAMKHAV IGLTKGAAVEYARH -N--IRVNAIAPGVVTPM--T-QHWA-----DSPEFTSA-----FF-Q-HN--VS-GRCAQ---P-EEIAGTVLHLCS--D-AAS---FVN 237  
147 QAH I-SYPR-T--AAYTAAKHGVLG LTKAI AKEYGEQ -G--IRCNVSPGVVDTP L--T-AGVI-----HSPQYKDM-----LL-A-PI--PL-KRFAT---P-EDIAKAALWVLS--D-ESA---YIN 240  
143 LGSV-GWRG-A--AAYVAKHGVCGMTKSAALEYSQA -G--IRVNAVGPFIETPL--I-ENAM-----TDEARAA-----LV-G-MH--PI-GRLGQ---P-EEVAALTNFLS--D-AAS---FVT 235  
154 GGI R-GIGN-Q--SGYAAAKHGTVGLTRNSAVEYGRY -G--IRINAIAPGA IETPM--V-ENSMKQL----DP----ENPRKAAEE-----FI-Q-VN--PS-KRYGE---A-PEIAAVVAFLLS--D-DAS---YVN 253  
143 GGI R-GVGN-Q--SGYAAAKHGTVGLTRNSAVEYGGY -G--VQINAIAPGA IETAM--V-EGSLRQI----GG----ENWEEAGRQ-----FV-S-VN--PM-KRFRG---P-EEVAALVAFLLS--G-EAI---FIN 242  
146 GSER-GLAG-A--CAYNAAKHGAVGLTRTAASEVAQK -G--VRVNCVMPGV IETPL--L-VGML EQMF-----DDVAAGMRK-----LG-E-VA--TL-NRVGQ---P-AEVGNVVSFLLS--D-EAS---YVN 244  
143 GSER-GLAG-G--AAYNAAKHGTVGLTRTAADLGP K -G--IRVNCVMPGV IETPL--L-NEVLVQM---FD----GDQLKGLD-----LG-W-VS--VM-NRCGK---P-AEVGHVVVFLS--D-EAS---FVT 242  
134 SGVK-ASAN-L--VAYNAAKAAVT LMTKSCALHFADKGYG -G--IRCN IHPGA IHTPI--I-DKVL AQS-----DDPDALYRS-----FV-D-VH--PV-KRLGK---P-EEIAAIAVYLAS--D-ASA---FAT 233  
146 AGL I-AAHN-L--ANYNASKAAVWVLSK IALHCARN -GWD I RCNSVHPT I RTPI--L-DDL IADR-----DEATMMAK-----LA-R-QV--PL-GRLGD---P-EEVAHAVVYLAS--D-ESR---FMT 244  
146 AGL I-ASDT-M--PGYNASKAAVWMLTKSVYALCAKR -G--IRVNAVCPGV IETPL--L-DG I SANAN-----LEKSVVMGK-----LA-R-QI--PL-GRVGE---P-DDIAAGVLYLAS--D-ESR---FMT 246  
147 AGL I-GVPA-C--GAYAAAKGGVRLFSKT IAVETAKD -G--IRVNSVHPGM I LTN I--Q-GVAQ-----EDNAANYDA-----TL-A-LV--PM-GYMGD---P-LDIANMNLFLAS--D-ESR---YVT 241  
140 AGIT-GQRA-L--SAYCAAKGGVRFSSKAAHL ECASARDN -IRVNSVHPG I IDTP I--F-HATEADERRA-----PVGQAAMDVGP-----MA-AFAV--PM-GVPGK---A-EDIAAACLYLAS--D-DGR---FMT 245  
141 DGMK-GANS-L--VAYASSKVGVRGLTKVAAAMELGHK -G--IRVNSVHPGGVDVTM--S-NHSG-----AAREDVDK-----GY-A-NV--PL-QRIGG---P-EEVAASLFLAS--D-DAS---YH 234  
141 QGIE-GIPG-L--HGYTASKFVRGLTRCIA IELAGR -G--VRANTICPGT IATPM--N-EGLD-----DPLQKGLD-----VS-G-FN--PM-NRKAD---P-REVAKLVVFLAS--D-ESP---FIS 226  
141 NGIR-GNRN-R--YGYVASKFVGLTKTAAALDFAPA -G--VRVNAVLPGM I STPM--T-AGLK-----V-----DT-S-LI--PL-GRPGN---M-EEIAQVVAFLAS--D-EAS---YIT 227  
141 AGLR-GGPG-M--FSYGAAKWA VRGMT RSAAHDLAPF -H--IRVNAVLPGP I DTM--I-NTGN-----DPALNAA-----IT-E-RT--LL-KRMGQ---P-REVAMATLFLAS--D-EAS---YVT 233  
141 GGMR-GGPS-L--FHYRTKWA VRGMT RSAAHDLASL -N--IRVNTVLPGP IETPM--M-KAGN-----SQDRIDA-----MK-G-RT--LL-QRLGQ---P-SELAAVLFLAS--D-EAS---YIT 233  
142 AGMA-ANYG-FPSLAYVASKFAVRGMTKATAMEYGYK -N--IRVNSVHPGF I QTPM--M-VEAT-----DEVGGD-----AL-A-EI--PL-GR IAD---P-SEVSNLVLFLAS--D-ESS---YIT 235  
142 AGMA-ANYG-FPSLAYVASKFAVRGMTKATAVEFVKH -N--IRVNSVHPGF I QTPM--M-VEAT-----DEVGGE-----AL-A-QI--PL-GR IAD---P-SEVSNLVLFLAS--D-ESS---YIT 235  
145 IGMF-PTAG-G--AAYNAAKKAVRIMS KAAAL EFDVDR -G--VRVNT I VPGGMNTPI--T-ANVP-----DVLKQK-----QT-S-QI--PM-KGLGD---P-IDIANGALFLAS--D-EAK---YIT 236  
144 YGLV-GAPG-A--AAYEASKGAVRLFTKACAVDLAPF -N--IRVNSVHPGV IATPM--T-QQIL-----DAPQSARA-----LL-G-PT--LL-GRAAQ---P-MEVSQAVLFLVS--D-EAS---FVH 237  
145 EGFV-GDPT-L--GAYNASKGAVRIMS KSAALDCAL KDYD -VRVNTVHPG I K TPL--V-DDLE-----GAEEMMS-----QR-T-KT--PM-GHIGE---P-NDIAWICYVYLAS--D-ESK---FAT 239  
153 MGLV-GMNE-V--SAYNASKGAVRLFTKGI AIEFAQK -KTP I RANSLHPGFVETPLLKAG -FQRVWDQGF A-----DKPDDL VAG-----VVT-G-AT--PI-GR LAQ---P-SELASAFFLAS--D-DSS---YMT 258  
142 AGLR-GTAA-F--TAYSASKGAVRLMTKSLAHELAGR -R--IRVNSVHPGLVETEM--G-RQLVSEIALR-----DRGDPTCPS-----DT-A-AV--QPL-DSAGA---P-HDIAHAVVFLAS--D-KAA---FMN 243  
143 SGLR-GDHA-L--VGYNAAKGAVVNLTRAMAVDHADP -N--VRVNAVCPGL IETPL--T-QAAK-----DAGLWYA-----WT-S-TI--PM-RRAGT---A-EEMASVVAFLAS--D-EAS---YVS 235  
142 ASER-GLPM-N--AGYVASKHAVLGLSRVAENAAEA -G--VRCNCLPGL IETPM--L-DGLP-----PEASQ-----MA-R-AV--PQ-GR TGS---S-DEVAQVAFFLS--D-AAS---HVT 233  
141 GSKR-GMAM-N--PAYVASKHGVLGLTR IAVEMAPH -S--IRANCI I PGFIRTEA--L-DRIP-----PEQADR-----IA-A-RV--PQ-RRMGS---P-EELAEVACFLS--D-AAS---HVT 232  
142 ASKR-GMAM-N--PAYVASKHGVLGLSR IAVEMAPH -G--VRCNCV I PGF I DTPA--F-DLIP-----PDQAAR-----IN-Q-RV--PQ-RRMGS---A-DELAEVACFLS--P-AAS---HVT 233  
145 GGIK-GISA-I--PAYAAAKAG IGMTRS IAVHCREQ -GYR I RCNS I APG I VTPM--T-AQAL-----AELPADNA-----GL-D-QA--HN-HGMGQ---P-IDIANMVLVYAC--D-DGR---HIT 240  
140 SAVS-GD-G-P--AHYCAASKAALMTRGMADELASK -K--IRVNTLVPGPTNTPM--M-QGIP-----QEWADA-----I-I-A-GV--PM-GRMAE---P-EDIAKVAVFLAS--D-DGS---FVT 230  
164 AALA-GN-G-P--VPYVAKAAV LGMTRAMARELAPR -G--IRVNAVNP GATETPI--Y-APLP-----DEVKAA-----VA-A-DS--VM-KRLAH---P-DEIAGAVVFLAG--N-DAS---FAT 254  
166 AALL-GV-AMP--LYYPASKAAV LGRTRAAAALAPY -N--IRVNAIAPGSVDTP L--M-HEQP-----PEVVQF-----LV-S-MQ--PI-KRLAQ---P-EELAQSLFLAG--E-HSS---FIT 257  
144 AARV-GSSG-E--AVYAAACKGLVAFS KTLAREHARH -G--ITVNVVCPGPTD T L--L-ADVTSGA-----ANPEKLEA-----FT-K-AI--PL-KRLGK---P-DDLAGAIAFFGS--D-DAG---FIT 241  
140 AGLK-GTAG-T--VVYNTSKTAVVGLTKCMALDFAAA -G--VRVNC ICPG I IDTPM--V-DTVLGHF-----GEAFTREA-----LA-R-RH--PL-GRLGK---P-EDIAGAFFLAS--D-DAS---WIT 236  
145 LSFQ-GGIR-V--PSYAAAKSGVAVG TKAMANELAPQ -G--VQVNA I APG I ATNN--T-AALQ-----ADETRDRQ-----IM-E-RI--PT-GRWGR---P-EDIAGAFFLAS--P-ASD---YVT 238  
149 LSFQ-GGIR-V--PSYTASKSGVAGLTKLLACEWAAR -G--VNVNA I APG I ATNN--T-SALQ-----ADETRDRQ-----IM-E-RI--PE-GRWGD---P-ADIGAAVFLAS--G-AAD---YVQ 242  
147 LSFQ-GGIR-V--PSYTASKSGVMTLRMANEWAKH -N--INVNA I APG I MATNN--T-QQLR-----ADEQRSAE-----IL-D-RI--PA-GRWGL---P-SDLMGPIVFLAS--S-ASD---YVN 240  
144 LGLR-QGSR-V--ATYAVSKAAT IQLTKVAALELARF -G--VRVNC ICPG I IATDI--N-RDFW-----ETEAGD-----ML-R-RV--PQ-RRLGE---P-RELDGPLL L L L AS--D-ASS---FMT 236  
148 LASR-VAGA-V--GPYLAAGKAGLH LTRAMALELARH -G--IRVNAIAPGVMTDL--N-EAFL-----ASEAGDK-----LR-S-RI--PS-RRFSV---P-SDLDGAL L L L AS--D-AGR---AMS 240  
136 SGER-GNVG-Q--TNYSATKAGV I GMMKSLGAREGARY -G--VRANAVAPG I DTEM--T-LAIR-----EDIREK-----IT-K-EI--PF-RRFGK---P-EEIAWAVAFLLS--PVASS---YVT 228  
136 NGQA-GQYG-Q--VNYAAAKSG I HGFTKALAQEGAKY -G--VTVNA I APG I IDTM--V-AAVP-----PAVLEK-----IV-A-KI--PV-GRLGH---A-DEIARGVAFCS--E-DGG---FVT 227  
136 NGQA-GQYG-Q--VNYAAAKSG I HGFTKALAQEGARA -G--VTVNA I APG I IDTM--V-AAVP-----QAVLEK-----IV-A-RI--PV-GRLGH---A-EEIARGVAFCS--E-DAG---FVT 227  
136 NGQA-GQYG-Q--VNYAAAKSG I HGFTKALAQEGARV -G--VTVNA I APG I IDTM--V-AAVP-----EPVLEK-----IV-A-KI--PV-GRLGH---A-EEIARGVAFCS--E-EAG---FVT 227  
142 NGQK-GQFG-Q--TNYSTAKAG I HGFTMALAQEVATK -G--VTVNTVSPG I DTM--V-KSIR-----PEVLEK-----IV-A-TI--PV-RRLGT---P-DEIGSIVAWLAS--D-ESG---FST 233  
142 VGVT-GNPG-Q--ALYASAKAG I GMSKSLGQELASR -G--ITVNCVAPG I RTAM--T-DALN-----DAQKGA-----IL-A-RI--PA-GDLGS---G-EDIGA AVVY LAS--K-EAG---YVT 233  
149 VGAT-GNPG-Q--VNYAAAKAGL VGMSKSLGQELASR -G--VTVNCVAPG I RTAM--T-DVLP-----DGQKDA-----LN-A-RI--PM-GRMGE---G-SDIGA AVVY LAS--K-EAG---YVT 240  
145 VGAT-GNPG-Q--VNYAAAKAGL VGMSKSLGQEVASR -G--ITVNCVAPG I RTAM--T-DVLP-----DAQKDA-----LN-A-RI--PM-GRMGE---G-EDIGA AVVY LAS--K-EAG---YVT 236  
140 VGTM-GNGG-Q--ANYAAAKAGL IGFSKSLAREVASR -G--ITVNVVAPG I DTM--T-RALS-----DDQDRAG-----IL-A-QV--PA-GRLGG---A-QEIANAVAF LAS--D-EAA---YIT 231  
152 MSEL-GRET-V--SAYAAAKGGLKMLTKN IASEYGEA -N--IQCNIGPGY IATPQ--T-APLRELQK---D---GSRHPFDQF-----I-I-A-KT--PA-ARWGE---A-EDLMGPAVFLAS--D-ASN---FVN 251  
142 AAQK-PGKQ-Q--SNYAAAKGGVEALTRALAVELAPR -N--IRVNAVAPG I VSTDM--S-QALV-----GAHEQE-----IQ-S-RL--LI-KRFAR---P-EEIADAVLYLAE--RGL---YIT 232  
143 RSFV-AAPN-A--AAYAASKGAVMQLTRALAVEWGGD -G--IRVNAIAPGFIETTL--V-PDHE-----KTAEREA-----IL-A-RT--PL-RRQR---P-DEIAGTAVY LAS--D-AAC---YVS 236  
141 YSLV-AAPE-R--ASYCASKAGVAML TRSLAVEWAPH -G--IRVNCVAPG I DTEM--M-RELA-----AVG IALEP-----LL-R-RT--PQ-GRLTQ---M-EDVAQVAFCD--P-RSV---HIT 235  
137 TASL-GLPG-R--NAYCASKSAVTMLTRSLACEWAAH -G--IRVNAVAPG I LTPA--V-QALL-----ASGERDMNS-----VV-R-RI--PV-ARLQ---P-DEVADIAFLAS--D-AAS---YVT 231  
150 GSFV-SYPQ-A--GAYCATKGGVLL LTKATAVDLAKY -G--IRCNVCPGA IETPM--L-QKYLDA-----EDKKA IMSV-----LT-G-AH--LI-PRLGK---P-EEVAKLACFLAS--D-DSS---FIN 247  
150 NGVS-PGLF-Q--GIYSVTKAAV INMTKVAFKECAPF -G--IRCNALLPGLTDTKF--A-SALV-----KNEAL I LNA-----L-T-Q-I--PL-KRVAD---P-KEMAGAVLYLAS--D-ASS---YTT 243  
147 VSDT-GRPN-L--SAYVASKHAVLGLTR I AADLAPH -G--VTCNA IAPGF FDTDM--A-APT V-----GHPERAKI-----FR-S-AI--AL-DRFGD---P-KEMVGPVQFLAS--D-ASA---YIT 240  
146 NAERMPFAG-G--APYAMS KSAALVGLTRGMARDLGPQ -G--ITVNVVCPGVDTPM--N-PA-----SGEFAES-----L-I-P-LM--AI-GRYGE---P-EEIASFVAYLAG--P-EAG---YIT 237  
146 NARRLPFTY-G--ALYSATKAAV LGLTKGAARDLGP K -G--ITVNV IEPG I DTDL--N-PA-----DGPWAAAP-----AL-A-AL--AT-GKFG---A-SDVAGLA AVY LAS--E-EGR---FIT 237  
145 ATAYGSPNE-W--VWYAASKGG I DSLTLGLAREVGI E -G--IRVNAVSPGPIGTEML--S-PE-----KVKMATS-----LS-P-----V-GRIGT---P-QEAAA AVMFLAS--D-EAS---FIT 234  
147 HEVI-PWPL-F--VHYAASKGG I KLMTETLAL EYAPK -G--IRVNNIGPGA I NTP I--N-AEFK-----ADPKQKAD-----VE-S-MI--PM-GYIGE---P-EEIAAVAALWVLS--K-EAS---YVT 240  
149 CGIR-AAPN-M--ASYASASKAAVHFTAAAAMEGAPL -G--IRVNAI VPGQVMTAA--T-QEFA-----DRAPEVAAR-----TT-G-AI--PM-QRGE---P-EELAEA I V F M L S--E-AAS---YVT 243  
149 AGR L-GSAG-A--LLYAAVKAGVDGLTRSAAMELGPR -S--IRVNAIAPSTVATEG--V-KAIL-----TPEQFES-----RV-G-QT--PL-GRLGE---I-DDIAQAALWVLAG--A-RSG---FVT 241  
143 VAYR-GRPN-T--GAYTT I KAG IAGLTKVLAGELGPR -G--IRVNAIAPGSVPTPA--T-DGFV-----TPEQYAQ-----RA-N-NI--PL-RRNGT---P-EDVARAAAF ILS--D-EAD---FVN 235  
147 VAYR-GRPN-T--GAYT I KGAVALTNVLAGELGPR -G--IRVNAIAPGSVPTPA--T-AGFV-----SAEDYER-----RA-A-GI--PL-RRNGR---P-EDVARAVAF I G--E-DAD---FIN 239  
141 AGLG-GSPG-V--YAYCTAKHAG IGLMRS LAKELVAGR -G--IRVNSLHPGPI DNSF--Q-TA I ED AF SPL-----IGGDATAM-----LN-S-MI--PM-GRHQ---P-AEIAQSALFLAS--S-MDA---FTT 241  
141 AGVL-GLQA-H--DTYSAAKAAVRSLARTWTELKGR -S--IRVNAVSPG I DTP I--I-ENQVSTQ-----EEADELRK-----FA-A-AT--PL-GRVGR---P-EELAAAVLFLAS--D-DSS---YVA 238  
136 GSMA-AVPG-N--VAYAAAKAGL RAMAR I V GKELLPR -R--IRVNMVSPGPTDTE I--F-KRDASA-----EEIQGMKDM-----LS-S-VV--PI-GRMGT---S-EEVARAVLFLAS--A-EAS---FIN 232  
137 GAHA-SLPG-N--AVYAAAKGGLYAAAMKVFAGELVSE -G--IRLNMVSPGPI DTP L--L-YRNPGMTD-----EA I AALKEK-----MI-E-NV--PM-HRMGQ---S-EEVAKAVLFLAS--D-EAS---FIT 235  
137 GSVA-TVPG-N--VIYATAKAGLRAAARTLAAELVGR -G--IRVNMVSPGPTETPI--I-NRTGGVPA-----EAVPGLREI-----MT-Q-AV--PM-KRMGT---P-EEIARPVLF LAS--E-EAS---FIT 235  
141 AAVG-PGYS-P--TAYAVAKAGV LHLTKVAAADLAKH -Q--IRVNAVQPGF I NTP I--F-TSSLMEPELEA-----QAKGA I AAM-----SQ-Q-AQ--PV-ARGGQ---P-EDIAQAVLFLAS--E-AAG---FVT 243  
171 GGI R-PSPG-L--GIYAAKALVALAKTAAVELGVD -N--IRVNAIAPGLDTPA--F-RATRQIPA-----GEDEG I FD-----N-V-AL--PL-GRVGS---P-AEVANMVAVLFG--D-EAS---YVT 267  
143 TYWL-KIEA-Y--THYISTKAAN I GFTRALASDLGKD -G--ITVNA IAPSLVRTAT--T-EASA-----LSAMFDVLP-----NML-Q-----A-I-PRLQV---P-LDLTGAAAF LAS--D-DAS---FIT 236  
143 AANT-APPN-G--APYVASKAGV VGLTRAAATEFGKY -N--ITVNS I APNPVTPG--A-DDA I-----NEDMFQA-----IA-Q-LQ--PV-PKVME---P-RHLTGAILFLCT--D-GAE---FIT 235  
141 SCFI-PPPG-L--TAYVASKAS I GYVRSLAGELGQY -G--ITVNAVAPGPTVTEG--T-RGGFPDEA-----FV-E-SQ--SV-KKVS L--P-EYSAPVVVFFAS--E-EAG---FVT 238  
141 HGLV-GSTG-K--AAYVAAKHGTVGLTKVVGLETATS -K--VTCNA ICPGWVLTPL--V-QKQ I DDRA--ANGG-----DPLQAMHDL-----LA-E-KQ--PS-LAFVT---P-EHLGELVFLCS--E-AGS---QVR 243  
141 HGLV-GSIG-K--AAYVAAKHGTVGLTKVVGLETATS -H--VTCNA ICPGWVLTPL--V-QKQ I DDRA--AKGG-----DRLQAQHD L-----LA-E-KQ--PS-LAFVT---P-EHLGELVFLCS--E-AGS---QVR 243

g|84570596|bdh2\_Rpickettii/1-256  
 g|33434517|Sphch/1-263  
 SLG\_32730/1-261  
 g|87199767/1-261  
 SG61\_1243/1-257  
 g|84570594|bdh1\_Rpickettii/1-260  
 g|334342462|Sphch/1-265  
 g|334343092|Sphch/1-255  
 g|334343456|Sphch/1-245  
 g|334343408|Sphch/1-258  
 g|146275993|Naro/1-256  
 g|146275997|Naro/1-246  
 g|87199890/1-279  
 SG61\_474/1-283  
 SLG\_24920/1-278  
 PP\_1951/1-275  
 PP\_2002/1-257  
 SLG\_15310/1-259  
 g|146275988|Naro/1-261  
 SG61\_609/1-245  
 g|146275674|Naro/1-255  
 g|334343007|Sphch/1-254  
 g|334343319|Sphch/1-259  
 g|87199902/1-261  
 SG61\_354/1-260  
 PP\_2214/1-255  
 SG61\_3175/1-254  
 g|146276032|Naro/1-246  
 SLG\_24920/1-278  
 g|334342802|Sphch/1-249  
 PP\_1708/1-252  
 SLG\_05090/1-250  
 SG61\_2863/1-244  
 SLG\_35070/1-243  
 g|146275941|Naro/1-266  
 g|334343077|Sphch/1-254  
 g|334342781|Sphch/1-260  
 SLG\_31530/1-250  
 SG61\_2583/1-255  
 PP\_2175/1-234  
 PP\_0488/1-253  
 g|2506152|YDFG\_ECOLI/1-248  
 g|334345036|Sphch/1-249  
 PP\_4862/1-254  
 g|3343446119|Sphch/1-241  
 SLG\_33310/1-241  
 g|334342779|Sphch/1-273  
 g|334342815|Sphch/1-290  
 g|87198230/1-306  
 SLG\_08640/1-305  
 SLG\_35880/1-297  
 g|87198815/1-310  
 SG61\_724/1-305  
 g|87198992/1-280  
 SG61\_2550/1-291  
 SLG\_33660/1-289  
 SLG\_07240/1-277  
 g|87198816/1-310  
 SG61\_2705/1-303  
 SG61\_1498/1-309  
 SLG\_35900/1-311  
 g|87198727/1-305  
 SG61\_3329/1-309  
 SLG\_12640/1-304  
 SG61\_2549/1-315  
 SLG\_28340/1-294  
 SG61\_2706/1-296  
 PP\_1745/1-269  
 g|334342965|Sphch/1-259  
 g|87199139/1-266  
 SG61\_504/1-269  
 SG61\_782/1-273  
 SLG\_38070/1-265  
 SLG\_27950/1-266  
 g|87200928/1-272  
 g|146275769|Naro/1-259  
 g|146275845|Naro/1-289  
 4BMV:A|PDB|n-pentyl/1-262  
 PP\_2989/1-264  
 SLG\_18780/1-267  
 PP\_0429/1-260  
 g|334343146|Sphch/1-268  
 g|334343373|Sphch/1-250  
 SG61\_4171/1-252

141 HGLV-ASAP-K--SAYVAAKHGIVGLTKVTALETAQN--R--VTANAICPGWVLTPL--V-QKQVQARP-AHG I---SVEQAKREL-----VI-E-KQ--PS-GQFVT---P-DELGALAVFLAS--E-AGR---QVR 243  
 147 HSLT-ASPY-K--SAYVTAKHGLAGLTKTLALELATF--G--ITANCI SPGYVWTP L--V-ENQIPDTMKARGM---TREQVMNDV-----LL-A-GQ--PT-KQFVT---V-EQVASMALYLCS--D-AA--NIT 250  
 145 HSLV-ASPF-K--SAYVTAKHGLAGFTKTIALELATF--G--VTANCI SPGYVWTP L--V-ENQIPDTMKARNM---TREQVINDV-----LL-A-GQ--PT-KQFVT---A-EQVAEIALFLGS--D-AAS--NIT 248  
 145 HSLT-ASPF-K--AAYVSAKHGIAGLTKTLALELATH--G--VTANCI SPGYVWTP L--V-ENQIPDTMKARGM---TREQVINDV-----LL-T-RQ--PT-KQFVQ---P-EDVAALALFLCR--H-EAR--NIT 248  
 141 HSLV-ASPF-K--AAYVAAKHG IAGLTKTLALELAQF--G--TTVNCI SPGYVWTP L--V-ENQIPDTMKARGM---TREQVMHDV-----LL-A-KQ--PT-KKFFVQ---V-EEVAALALFLCR--D-EAQ--NIN 244  
 144 HSHE-ASPL-K--SAYVAAKHALLGLARVLAKEGAEF--N--VRSHVICPGFVRTPL--V-DKQIPEQAKELGI---SEEEVRRV-----ML-G-GT--VD-GVFTT---V-DDVARTALFLCA--F-PSA--ALT 247  
 149 YGYR-GTVN-R--VDYVTTKTAIQGLTRATALETAGG--P--ITCHALMPGSLVTP L--W-SDRLERMMIEEGL---TRPEAEIRF-----LD-G-KQ--PS-GRFVD---A-DSVAEVL L L LCG--P-AGT---DMN 252  
 147 AARL-YTPS-AP-CSYAAKAGVIHL SHHASCAYADD--N--IRVNAVLPGLTAPQ---I-ASMF-----TAEQAEI-----AG-E-NQ--VI-RRAVD---P-REIANAVLFLSS--D-DAS--MIT 241  
 142 AAHR-GSAQ-H--AHYAATKGA INSLVRSLAKEIGPD---IRVNAVAPGLIATPM--T-VALL-----QGRGVT-----DL-E-ST--PL-KRHGQ---P-AEVASVIGFLCS--S-SAS--YVT 232  
 153 AAFHYPGKG-A--SLYAITKSAVVRMTEVLAWEWATA--N--INVNCIAPGAFSSEM---M-DGMR-----SRIGDG-----FI-E-KF--PR-KRLGD---P-AQLDSTL LYLAS--P-ASE--AVT 245  
 141 AGIV-GHPA-N--PAYSAAKHG VVGLVKSCVDFAFAAR--G--ARINALCPGGVETPL--I-GAPD-----VAIVPA---DL-P-RV--PA-RGMGR---A-QHVAEVALW LSS--P-AAG--FIT 233  
 137 AALQ-GIAY-T--VAYVASKHAVAGMTKSLAVEFASR--G--VRVNAICPGDVKTPT--T-QQTA-----VPENVDWA-----LVMR-NAP-KLL-DGSCF---P-EDIAELFAFLS--E-RAR--KIT 233  
 168 AGLV-TEPI-VG-LPYMPAKAGVLMHVRALGLELAEF--G--IRINAIAPGPFVTNI--G-GGWL-----KKDPVARAA---WD-A-IV--PL-GSVAE---T-DQIKPLALLLAS--D-ASD--YMT 263  
 168 AAEV-NEAI-VG-VPYMAAKAGVKKHMRHAAFELAA Y--G--IRVNAIAPGPFVTNI--G-DGWV-----KKNPAAKA---WD-E-LC--PL-GRMAE---T-YQIKPLALLLAS--D-AGS--YMT 263  
 168 AAVI-CEAI-VP-LPYMPAKAGVSHMVKHLFAFELAEY--H--IRVNAI L PGPFDLNI--A-DGSL-----KDPVVREA---WD-K-ST--PM-GRIAE---P-YQIKPLALYLAS--D-AAS--YVT 262  
 164 SALR-PAVT-LG-AAYAAAKAGAAQVRATALEL ASD--G--VRVNAIAPGPFETDI--G-GGFM-----HNSEVRAK---MA-A-GV--PM-GRIAE---V-EEIKPLALYLAS--K-ASS--FVT 258  
 149 RARQ-SEPD-T--EAYAASKGGLVALTHALAMSLGPE--G--IRVNAVSPGVIDARD--P-SQRRL-----AEPLSEA---DH-A-QH--PT-GRVGT---V-EDVAAMVAWL L S--R-QAA--FVT 240  
 153 GGLHVPNEW-A--HAYGASKAALHHLTRLSAKRLGRD--G--IRVNAIAPGPFHSRM--T-DTTS-----EAVKAS---VA-A-HI--PL-GRPGE---A-DDVKGLCLFLAS--R-AGA--YVH 245  
 158 LGWR-AQKG-Q--AHYAAKAGVMAFTRCAAL EAADH--G--VRINAVAPSLAMHPF--L-AKVT-----TEERLAE---LV-K-TE--AY-GRP AE---V-WEVANVMFLAS--D-LSS--YMT 250  
 131 TGVK-PMAG-T--GAYGSSKAAL AHLAKIAALENAGA--G--IRVNAIAPGGVDTP I--W-DSANFRAMAAD---MGDRAA IAG-----FA-S-GT--PL-KRFAT---P-DEIAATIGFLLS--A-QAA--NIT 233  
 150 AAFE-GQIG-Q--PAYAASKG VVGMALPIAREFARY--G--IRVNTIAPGIFWRTL--L-GSLP-----QEAQDS-----LG-R-QVP--FP-SRLGK---P-AEYAKMVEAIV---TNP--MLN 249  
 149 AAFD-GQIG-Q--AAYAASKG VVGMTP LPIAREFARY--G--IRVMTIAPGLFLTP L--L-ASLP-----QEAQDS-----LG-R-QVP--FP-SRLGH---P-DEYALMVEQIV---ANP--MLN 239  
 154 AAEV-GQMG-Q--AAYAASKG VVGLTLPVARDL MSE--G--IRVNTI L P G I FNTPL--M-NRAP-----EEVKAA---LA-A-SVP--FP-KRLGN---P-EEYASLAVEMC---RNS--YFN 244  
 156 AAEV-GQMG-Q--AAYSASKG VVGMTP LPIARDL MSE--G--IRVNTI L P G I FNTPL--L-QGAP-----DNUKAS---LA-A-SVP--FP-KRLGQ---P-EEYANLALCM I---ETG--YFN 246  
 155 AAVD-GQMG-Q--AAYSASKG VGMTP LPIARDL MSE--G--IRVNTI L P G I FRTPL--L-AGLP-----EAAQAS---LA-A-QVP--FP-KRLGH---P-EEYANLALVMTMI---EIG--YFN 245  
 150 AAYD-GQIG-Q--AAYAASKGAIASLTLP AARELARF--G--IRVMTIAPGIFETPM--M-AGMS-----DEVRAS---LA-A-GVP--FP-PRLGR---P-QEYAAARH I---ENS--MLN 240  
 143 ASFE-GQEG-M--GAYTASKSALAALTLVWARDLSH--A--IRVNVAPGFMPTPM--V-AMLP-----PDFVAE---LL-A-DNE--FP-KRAGR---A-EEYGQVAFEL I---RTP--L I N 233  
 140 AGQN-GQIG-T--AHYAASKG IITLTKYFARDLAPF--G--VAVSAIAPGFLD LPS--V-REL V-----PAELTA---LT-E-TI--PV-RQLGD---P-GFIARTAVHLAG--R-DAA--FAN 233  
 143 APQK-IPSV-AG-AAYVVS K GALLTLTKVAAGEA P F--G--MTVNTVAPGAI DTPM--L-RERT-----PVEQFEQ-----LF-G-PT--LA-GRPAR---P-DEIASAVLYLAS--E-QAA--FVN 236  
 146 SAHT-PRPF-T--APYTASHAVLGLTKALALDGRPY--H--IVCSQVDIGNAL TEL--S-ERMT-----RGVRQANG---EIA-A-----EPMLD---V-RHVADAVRYI AALPL--DAN--VLN 238  
 144 SAYS-PRPD-T--PAYCASKHVLGLTRLSAKSLGRRH--D--IAVGQIDIGNAASAF--S-EAFA-----RGVPAQD G---RLV-P-----EPYMD---A-SVVGETVAYMDSLPP--DAN--AQF 236  
 146 SARV-PRAD-S--PAYAASKWGLDGLTRSLAIDGREF--N--IAASMFNP GIVATEI--A-PGAV-----KLDKDF-----AAM---P-EDIAADAIHMTALPD--HLN--FYE 230  
 143 SAQM-PRAD-S--IAYTASKFLEGLTRALALEGRPH--G--ITASIH P GATISEL--I-GER S-----LRAS-AS-----PTTME---A-RHVAELVATMAAVPD--EIN--VLS 229  
 147 NGVN-AHMG-S--ADYNVAKEAVRAYSRTAAREWAPY--G--ICVNVICPAAVSAAY--R-RFAE-----MAPQVAAA---LA-A-AN--PM-GRMGD---PESDIGGVAFLAS--E-DAR--YLT 241  
 144 GATM-GLPE-V--GAYAIAKEGVRLTKTAAATGWGRY--G--ITVNTVCP-MVATPL--F-DTWVQ-----SLSEAEREH---QL-S-MI--PM-RRMGD---GEQDVGGLIVFLGS--E-AG--YIT 239  
 145 AGLI-DDPI-HS-CAYSASKGAVHSYRSLAK EWAKY--N--IRVNSVNTMATNAE--I-DTLAKMTP-----EEQQFRAK-----IQ-D-AI--PLGGKMG E---TYRDLAPVLAF L AS--D-DSR--FIT 246  
 135 AGRY-GYPN-R--IAYATSKWGLVGF AKTLAIELGPH--D--ISVNAI L P GAVGGER--F-DRVIEGRARASG---RSFEFVAAL-----GL-G-SQ--SL-KRIVA---P-AHVADLALFLTT--P-AGR--SIS 237  
 147 VAHR-FAPDGL-R--AVTAAAKAGLEALRSLA L E L G P Q--G--VTVNCVAPGVT RKEA--S-GHRA-----IPEAMEAL E---MA-S-RA--PT-GRIAE---P-DDIAAAVAFLMG--P-DAR--QIT 242  
 136 WAFE-PSEL-F--PTSAVFRSGLAAFTKIFADQFAGD--N--VRINNVLPGWIDSLP--AT-EQRR-----D-SV--PL-KRYGT---C-EEIAATIAFLAS--E-GAA--YIT 220  
 137 AGTY-PYPG-G--NVYGASKAFVRFSLNLRADLAGT--R--VRVNSI EPGLCSGTD--F-SVVR-----NGDMDAVQA-----LYRD-----VEALL---P-EDIAATVAWVAE---QPA--HVN 228  
 136 AGSW-PYAG-G--NVYGATKAFVRQFSLNLRDLHGT--A--VRVDI EPGLVGGTE--F-SNRF-----KGDDGKA EK-----TYQN-----VTALT---P-EDVSEAVVWVST---LPA--HVN 227  
 138 AATY-PYAG-G--NVYGGTKAFVRSQFSLGLRSDLHGT--G--VRVTSI EPGMV-ETE--F-TLVR-----TGSQTASDA---LYHA-----ANPMT---A-EDIAETLFWVAT---QPA--HLN 227  
 141 AGNY-PYPG-S--NVYGGTKAFVRSQFSLRCDLRTGT--G--VRVNSI EPGLC-ESE--F-SLVRF-----GGDAQYDA-----TYAG-----AEP IQ---P-QDIAETIFWILN---QPA--HIN 231  
 141 AARI-VTPA-S--SVYSATKHAVRVIDGLRQ EHN--N--IRATILSPGPTSEL--G-HDVS-----DPNIAAW-----IK-Q-----GL-TAQS---P-FAIAQAIRYALE---QPD--NVD 228  
 141 AAHF-VMPT-A--AVYCATKHAVWAITDGLRQ EHD--D--IRATV I S P G V V A T E L--G-HDIT-----DQNVAAA-----LQ-E-----WR-RKSLT---P-DAIARAIRFAL E---QPE--GVD 228  
 143 AAIM-HPPF-L--QPYNVAKTAVVALSSGLRQEFQEE--GAPIGVSVLYPFFTQTRI--A-DDERNL PASMGR---EEADPTLAA---LR-E-EVR-AGL-ATGQT---P-AEVAEAVMAGIR--A-DRL--HIF 250  
 144 SGLV-GGTA-T--MAYCTAKAGVVGLSESLRTELKGS--G--IGVSVLCPGPVATS I--L-THSAENLASVSV---SRPVSAER-----RD-A-QMS-NVL-EKAIQ---P-DEVGRVLAAR I--A-NQF---YIH 248  
 146 GGLM-GSAL-A--APYSAAKAAVINLMESYRQGLDKH--G--IGVSVLCPGANIKSNI--A-EASRLRPAQFGK---SGYVNEES-----IA--SLH-SIH-QHGM D---P-VELAEHVKAGIV--A-NQL--YI 249  
 146 GGF M-GSAL-A--GPYSAAKAASINLMEGYRQGLEKY--G--IGVSVCTPANIKSNI--A-EASRLRPAKYGT---SGYVNEES-----IA--SLH-SIH-QHGLE---P-EKLAEAIKKGV--D-NAL--YI 249  
 146 SAFV-ALPT-T--GIYCTTKYAVRGLAESLRVEMP KY--N--IGVSVLCPGGVNTNI--H-RSVEARPEKYGN---TGYGRDEA-----VF-A-GLK-RVI-EHGF D---P-VDLGRVLD A VR--N-DRF--WV 250  
 152 AAF L-AAGS-P--GIYNTTKFAVRGLSESLRHSYLLKY--E--IGVSVLCPGLVKS YI--Y-ASDDIRPDAL KG---EMKPVDKTA-----VE--RLA-GVH-EFGME---P-DVIGARVIEAMK--A-NRL--HIF 255  
 148 ASFI-AGGA-P--GIYNTAKFAVRGMSYSLRHSMYKY--G--IGVSVVHPGLVKS YI--Y-ASDDVRPDAL KG---AMKPVDT EA-----VK--RLE-GLH-EFGME---P-DIIGARILDGVR--E-NRA--NIF 251  
 149 AATV-VMPG-HL-AIYAAGKA AVLNTENMRADLAGR--G--IGSVLCPG F VRSNI--H-EAARNRPAHLREG---SGFAASEQA---LS-M-RE--TG-SEWMD---P-DAVGEVADAIL--A-DQL--YV 253  
 149 AAEV-VMPG-QM-AIYAASKA AVNCHCEAAKGLAQH--D--IGVSI L P G P V K S NI--H-ETIDNRPEHLREG---SGFKAASEK---LS-M-RI--VG-DNWM E---P-EDVGNLVAAIL--N-NTT--YV 253  
 146 AGLT-PMPS-FM-AIYATAKA AVITLTETIRDSMAED--N--IGVTVLMPGPIKSR I--H-ESGQNRPERFRAG---SGLAETEQQ---LA-K-RV--VA-DNWM E---P-TEVGD MIVDAIV--H-NKL--YVS 250  
 140 GAVM-SARL-TR-GIYAPTAAV I S T E H L R L E L E A K--G L A I G A S V V C P G P V A T N I--A-DQTEENRPAARFVE---SFRGAREP---HG-ALP-A-DTG-GA-PFWDL---P-LDVGHMTLHAIR--A-NKL--YV 250  
 144 SALV-PVAG-T--TIYSAGKAAVAMMCEMRPELEGR--G--VICSAFCPGAVQSN I--A-DAAKTRPAELAD---VTYAEADK-----R-RA--AG-GNFMHLYQTK-EQVGERVLEGI L--N-DEL--YI 247  
 147 AGVL-QY-S-QA-GMYVATKFAVVVGLSEALRAELAPQ--G--IGVSAFCPG F VRSNI--R-EYEKTRPARFAAQ---DEAPKGGPPP---RF-NLS-D-EDRERLS-KLTAS---P-EEAGEI VLQGI R--D-NAL--YI 256  
 145 GGFS-AV-G-TA-GLYCTAKFAISGMMEALATELEGT--P--IGVSCFYPPGPVQTNL--GATTGEVRPEHLQNE---PQPEVGP---DG-RPP-R-NFTF-DP-SVFMS---K-EEVGKRVLRGIR--R-GDL--FIM 252  
 145 GGFS-AV-G-GA-GLYCAAKYCVAGMFESLARTDLRGT--A--LGASVFFCPGPVQTNL--GISTQATRPEHLRNEAPP P P P P S V G A Q Q---DK-RPA-P-G-F-DP-SLFMT---S-EEVGQRVLRGIR--R-RDL--FIM 256  
 146 AAYL-SGPQ-A--GIYTASKFAVRGLTESLRYNLAPH--G--IGVSLMCPGLTRTNA--W-TSALKRPDGFAE---SGFKPADAT---EL-E-QFG-TAF-ELGMD---P-FEVGQKTLAGMI--E-NRG--LIL 250  
 150 AAF L-PGPQ-A--GIYTASKFAVRGLTESLRYNLAPH--K--IGCSLCCPALTRTNA--W-TSALKRPDGFGT---SGFPDVAKG---EL-E-QFG-TAF-EEGMD---P-YEVGTKILAGMT--E-QKG--LIL 254  
 145 AAYL-SGPQ-A--GIYTASKFAVRGLTESLRYNLAPH--G--IGVSLVCPALVATDA--G-LSALKRPARLGE---SGFAPVDEA---EL-R-HFA-SAF-SNGMD---P-L EAGEKILRGMS--E-NRG--LIF 249  
 144 AGIV-PLPG-F--AAYTSKYAVRGLYAESLRYNLAPH--G--IGVSVLCPGATRTGM--L-HPPEDEPRTDFNE---EAAGTFQKA---LW-D-----AA-RAAID---P-LDTGRAVDAIK--E-NRF--LIF 245  
 144 AGVV-PLPG-M--GAYSAGKYAVRGLTQALRLDLAPH--G--IGVSVLCPGAVKAL--M-AIPEDDASAPPGE---E--GDFIRN-----LW-A-----AM-RVAVD---P-MDMGRVVDAIR--E-NRF--HIL 243  
 144 AGMI-PVPP-FM-GVNYAASKFAVRGLSDSLRRLALAPY--N--IGVSVLCPGMVKTNA--M-TAGDVYRQAHEG---AGADEKRD-----TI-EGGMD---P-FDLGNEVDAIE--N-NRP--YIF 241  
 139 AALM-QPPP-M--SNYNAKAGV LALSESLVELRQV--E--VAVHVVCPSPFFQTRN L--L-DSFRGPNPAMKAQ---VGKLLLEGSP-----IS---A-ADIADYIHQQVA--A-GEF--LIL 232  
 141 SALY-GSPG-L--AVYSATKYAIRGLSEALDVEWRSS--G--VKVRCLFPTFVDTPM--L-AAAPGSSEDSK--RD-----RVL-KSGATLTS--V-EEVADHAWKAVH--D-DRL--HVL 234  
 140 AGIY-GSPG-A--SVYSATKFGVRAIT E S L DGEWAED--G--IRVRDLMPGFIETPL--L-DHAPNRASNDI RS-----RVR-GAGLEITP--V-SEVAEAAWAVH--G-ERL--HTL 234  
 140 AALY-GMPS-Q--SIYGTAKAGVRSLETLDGEWQAD--G--IRVRS L M P S F I D T P L--L-SHPNSRSNVP I RQ-----RVA-EAGLEFTP--V-EEVADNAWDAVH--G-DRV--HYL 234  
 148 ASRM-VAPN-L--SAYCTGKI AQNRVVAEAAAELAGT--G--VSVFAIDPGFVFTQL--A-RETMESPEAQKYL---GGMVDR LRA-----ASG-DPAAQ--TDL-ARCAQRVLDLAS--G-RY-----245  
 145 AARK-VAPY-L--SAYCTGKI AQNRIVEAAAELADT--G--VKIFAIDPGFVFTSL--A-RDTMNAPAAQKWL---PGMVARLKE-----VSD-GSETA--AGL-ARCAQRCLD LVS--G-RY-----242  
 146 AGTF-VAPP-A--SAYAVAKASIRLTHELDRAEQAA--G--VRAFAIQPQTIMTAM--A-QETLKSPEAHFA---KPLVALLES-----TTA-EESAQ--GM-ARLRRFVVALAA--G-EH-----242  
 139 AGKV-GSPM-R--TGYSAAKFGFLGYS DALRAEFVAGL--G--IKVHV I A P G S I R T D V--S-RNAI-----TADGSRRG-----V-S-DK--AI-ENGLD---PADAVDQMLSAI--A-D-ERE--IM 232  
 141 GGLR-GAAF-N--AAYCTSKAAVKMLSKCLGA EFAAL--GYNIRVNSVH P G G I D T P M--L-GS I M D K Y V E L G A A---PSREVAQAA---ME-M-RH--PI-GRMGR---P-AEMGGGVVY LCS--D-AAS--FVT 246  
 154 GAFG-AMPA-Q--TAYVVTKHAVQSFTECLYEMQL--GLPIHVSAIVPGMIRTNI--F-NAEAGDGEP AHSQ---AHRRAMFEMMRDYGMDLDEGRL--FL-----EQMAEKKFVAHSQPDQSEQ---I I A 265  
 142 VGFA-PEFG-M--SIYGATKAFVFLSQGLNLELSPS--G--IYVQAVLPAATRTEI--W-GRAG-----ID-V-NTL-PE---VME---V-DELVDAALVGF D---RRE--LVT 225  
 142 VGFA-PEFG-M--SIYGATKAFVFLSQGLSQELSPK--G--VYVQAVLPAATRTEI--W-ARAG-----ID-V-NTL-PE---VME---V-GELVDAALVGF D---RRE--LVT 225  
 142 FAFD-YMPG-A--SVYAATKSYVAQLTHVLDAELREK--G--MRFQALVPLTRTEL--G-GDAE-----FF-D-MFP--PE--HVMS---P-EVLVEVSLASLE---LGE---RVC 226  
 141 AGVA-PGPW-M--AAYAASKAYVLSFSQALREELKRT--G--IKVSVLCPGPVRSAR--R-RIAR-----LDG-K---PR---CLS---P-EEVALYTVRALD---KNR--AL I 222  
 145 VADI-MSND-H--CSYMGAKAALNQMTRFVAYEYGHK--G--IRAN I L A P G L T I T P M--L-GGFN-----VPLGVEA---YA-K-EY--PL-GRITT---V-EDIAANAALFMAS---DEC--FMT 236  
 129 VTLG-DFPL-A--AAYTGSKQAVEGFTASLAIELAYF--G--VRAKLVEPGYAPTR--F-GANSIVPVDQLLP---GDYAAFAQP-----IL-E-AF--ANPMTTR---E-SDVAEAVWNAVH--D-DSGRLRFP A 236  
 129 VTLA-PMPL-V--AAYTASKTAVAGFTASLAL E L A A F--G--IGAKLVEPGYGPTR--F-AQNTDLRL E D T I P--EAYADFA RP-----FL-E-AF--AQPALVTT---P-QDVAETVWRAAT--D-SGERLHYPA 236

gj|146275658|Nara/1-269  
gj|334343486|Sphch/1-273  
gj|146275875|Nara/1-252  
PP\_1946/1-262  
PP\_1817/1-253  
gj|87200975/1-250  
SG61\_1215/1-250  
gj|146275951|Nara/1-252  
SG61\_2016/1-248  
gj|31615388|Levodione/1-267  
gj|87200486/1-256  
SG61\_3730/1-262  
SLG\_20040/1-258  
gj|146275686|Nara/1-245  
gj|334342862|Sphch/1-257  
gj|87198897/1-259  
gj|146275698|Nara/1-254  
gj|334343337|Sphch/1-258  
gj|146275892|Nara/1-259  
gj|334342592|Sphch/1-246  
gj|334342962|Sphch/1-244  
gj|334342992|Sphch/1-245  
gj|334342994|Sphch/1-245  
gj|334342590|Sphch/1-248  
gj|87198536/1-248  
gj|1708836|2,5-DDOL\_Sjap/1-250  
gj|62286565|CPNA\_COMS9/1-250  
gj|33112056|R-specificADH/1-252  
gj|146275770|Nara/1-271  
gj|334342841|Sphch/1-255  
gj|334343813|Sphch/1-269  
gj|87200879/1-249  
SG61\_3344/1-248  
SLG\_12690/1-249  
gj|146275758|Nara/1-253  
gj|729773326|steA\_Ctestosteroni/1-243  
gj|146275834|Nara/1-267  
PP\_1953/1-269  
gj|39647578|badH\_Rpalustris/1-255  
gj|334342959|Sphch/1-250  
gj|334342606|Sphch/1-251  
gj|146275741|Nara/1-255  
gj|1730032|kduD\_EcolliK12/1-253  
gj|334343307|Sphch/1-251  
PP\_2794/1-255  
gj|16330475|3-ketoacyl-ACP/1-240  
gj|334342640|Sphch/1-240  
SLG\_38730/1-240  
gj|87201224/1-240  
SG61\_907/1-240  
gj|518742570|acetyl-CoA/1-246  
gj|334343976|Sphch/1-246  
gj|87199449/1-254  
SG61\_1203/1-250  
gj|388477173|fabG\_Ecoli/1-244  
gj|146318879|gluconate/1-271  
PP\_2783/1-245  
gj|334343549|Sphch/1-249  
gj|334343458|Sphch/1-251  
gj|87199578|part2/1-253  
gj|87199495/1-266  
PP\_3926/1-255  
gj|334343112|Sphch/1-262  
PP\_1852/1-249  
SG61\_1419/1-249  
SLG\_12130/1-244  
gj|649014081|glucose-1-dehydrogenase\_Bsub/1-261  
gj|146275833|Nara/1-261  
gj|87199577/1-257  
SG61\_3726/1-249  
SLG\_20080/1-253  
gj|334342771|Sphch/1-253  
gj|512125550|n-pentylphenylADH\_Ralstonia/1-251  
gj|87200895/1-246  
SG61\_3191/1-249  
SLG\_07180/1-248  
gj|87199020/1-282  
gj|334343475|Sphch/1-279  
gj|81821161|PED\_AROAE/1-249  
SLG\_18890/1-249  
SLG\_18590/1-251  
gj|167033792|bdh/1-256  
PP\_3073/1-256

242 GQV L V C D G G G A S H V P - - - - G L A G F R S - - - - - F F A G - - E Q  
243 G H C L P V D G G T M A H L P - - - - T S P A A H G - - - - - W - - - - L R R N M G I D - - - - -  
240 G H A M V V D G G A T A F - - - - -  
240 G H S M S V D G G V A V T A V - - - - G T R M D D L F - - - - -  
241 G H C L T V D G G A T A I - - - - -  
238 G A T F T I D G G Q T A H - - - - -  
238 G A T F V I D G G Q T A H - - - - -  
241 G A T L A A D G G Y L A - - - - -  
236 G A Y Y P V D G A Y L A Q - - - - -  
254 A T V V P I D G G Q S A A Y - - - - -  
243 G A T I P I D G G Q S Y K Y - - - - -  
245 G A K W E I D G G A L A T I R - - - - N D - - - - -  
243 G A A W P V D G G A L C T I K - - - - H - - - -  
234 G A E F R V D G G A S I - - - - -  
245 G A E L K L D G G I S A M - - - - -  
247 G A E L K L D G G I S A M - - - - -  
242 G T E L V V D G G M T A L - - - - -  
246 G T E V I V D G G F C A A - - - - -  
235 G A E I V V D G G M T V G T Y - - - - Y M G F P G S - - - - P G M - - - - -  
227 G T D I L I D G A E L A G H G - - - - P L A A L - - - - -  
228 G A E F L V D G G V V Q R V I - - - - G Q - - - - -  
234 G T E I I V D G G Y S A - - - - -  
234 G I D L P V D G G T M A - - - - -  
236 A S E H L V D A G M L A H - - - - -  
236 G S E H L V D A G M L A H - - - - -  
237 G V D L P I D G G W S V G V - - - - -  
238 G S E L V V D G G Y T A N - - - - -  
240 G A E F V V D G G Y T A Q - - - - -  
259 G A E L V I D G G W T A Q - - - - -  
244 G S E F V I D G G Q T A - - - - -  
236 G S V I V A D G G M D A A T G - - - - Q P D L A K - - - - L A S E L L L N - - - - A E K A A - - - - -  
234 A Q A L A V D G G M L G T M R - - - - V - - - -  
233 G Q D W A V D G G V L E S I E - - - - V - - - -  
234 A Q G W A V D G G V L E T L E - - - - V - - - -  
241 G T N I V I D N G E T M A - - - - -  
231 G Q N V A V N G G S A F L - - - - -  
255 G S T V N V N G G A W F S - - - - -  
258 G Q T L S P N G G M H M - - - - -  
242 G Q V L S V S G G L T M N G - - - - -  
237 G T S L V V D G G T M A G A - - - - -  
239 G Q I L V V D G G W L A R - - - - -  
243 G H V L A V D G G W L A R - - - - -  
241 G Y T I A V D G G W L A R - - - - -  
237 G S V I V A D G G H L T S T - - - - -  
241 G A E I V V D G G H L C S S - - - - -  
229 G E V L R V N G A H H T - - - - -  
228 G S T L S I N G G Q H M Y - - - - -  
228 G S T M S I N G G Q H M Y - - - - -  
228 G S T M S L N G G Q H M Y - - - - -  
228 G S T M S L N G G Q H M Y - - - - -  
234 G A D F S L N G G L H M G - - - - -  
234 G Q T L H V N G G M A M I - - - - -  
241 G Q T L H V N G G M A M I S - - - - -  
237 G Q T L H V N G G M A M M S - - - - -  
232 G E T L H V N G G M Y M V - - - - -  
252 G H I L Y V D G G I L A Y I G - - - - K Q P E A - - - - -  
233 G E V L S V N G G L K M P - - - - -  
237 G A I I P V D G A Y L A G - - - - -  
236 G Q V I A V D G G W T A N G - - - - - Y I - - - - -  
232 G A T L Q V D G G Y L A S G H - - - - P P D G P M P - - - - -  
248 G A S Y V I D G G T L A W R G - - - - Q R V - - - - D - - - -  
244 G T T L N V D G G F L S - - - - -  
241 G H M L P V D G G V A N I L S - - - - L P V V V E T - - - - -  
238 G A S L T V D G G F A A - - - - -  
238 G A E L A I D G G Y S I - - - - -  
235 G A N L A V S G G R - - - - -  
241 G I T L F A D G G M T Q Y P S - - - - F Q A G R G - - - - -  
244 G T A L P V D G G K A A Q L Y - - - - M P G - - - - -  
242 G Q S L A V D G G L G H T L R - - - - R - - - -  
236 G A M L A I D G G I I A A G - - - - -  
240 G A M L A I D G G I I A A G - - - - -  
242 G S I L V A D G G F T A - - - - -  
239 G I E L F V D G G L T Q V - - - - -  
233 G V D L C V D G G C I E L G - - - - -  
236 A A N L F V D G G M L E L R - - - - -  
236 G I D L Y V D G G C V E L - - - - -  
244 G T S L I V D G G I T V G P R - - - - H S W D P N M - - - - P G L F D A L - - - - Q Q M K E S - - - - G K V S - - - - -  
268 G G L Y H V D G G L G V - - - - -  
237 G Q T L A V D G G M V R H - - - - -  
236 G Q N L H V D G G M V R A G - - - - -  
239 G Q T L V V D G G D A K H - - - - -  
244 G A A W N V D G G W L A Q - - - - -  
244 G A A W N V D G G W L A Q - - - - -

269  
273  
252  
262  
253  
250  
250  
252  
248  
267  
256  
262  
258  
245  
257  
259  
254  
258  
259  
246  
244  
245  
245  
248  
248  
250  
250  
252  
271  
255  
269  
249  
248  
249  
249  
253  
243  
267  
269  
255  
250  
251  
255  
253  
251  
255  
240  
240  
240  
240  
240  
246  
246  
254  
250  
244  
271  
245  
249  
251  
253  
266  
255  
262  
249  
249  
244  
261  
261  
257  
249  
253  
253  
251  
246  
249  
248  
282  
279  
249  
249  
251  
256  
256

g|84570596|bdh2\_Rpickettii/1-256  
g|334345171|Sphch/1-263  
SLG\_32730/1-261  
g|87199767|1-261  
SG61\_1243/1-257  
g|84570594|bdh1\_Rpickettii/1-260  
g|334342462|Sphch/1-265  
g|334343092|Sphch/1-255  
g|334343456|Sphch/1-245  
g|334343408|Sphch/1-258  
g|146275993|Naro/1-256  
g|146275997|Naro/1-246  
g|87199890|1-279  
SG61\_474/1-283  
SLG\_24920/1-278  
PP\_1951/1-275  
PP\_2002/1-257  
SLG\_15310/1-259  
g|146275988|Naro/1-261  
SG61\_609/1-245  
g|146275674|Naro/1-255  
g|334343001|Sphch/1-254  
g|334343319|Sphch/1-259  
g|87199092|1-261  
SG61\_354/1-260  
PP\_2214/1-255  
SG61\_3175/1-254  
g|146276032|Naro/1-246  
g|334342802|Sphch/1-249  
PP\_1708/1-252  
SLG\_05090/1-250  
SG61\_2863/1-244  
SLG\_35070/1-243  
g|146275941|Naro/1-266  
g|334343077|Sphch/1-254  
g|334342781|Sphch/1-260  
SLG\_31530/1-250  
SG61\_2583/1-255  
PP\_2175/1-234  
PP\_0488/1-253  
g|2506152|YDFG\_ECOLI/1-248  
g|334345036|Sphch/1-249  
PP\_4862/1-254  
g|334346119|Sphch/1-241  
SLG\_33310/1-241  
g|334342779|Sphch/1-273  
g|334342815|Sphch/1-290  
g|87198230|1-306  
SLG\_08640/1-305  
SLG\_35880/1-297  
g|87198815|1-310  
SG61\_724/1-305  
g|87199892|1-280  
SG61\_2550/1-291  
SLG\_33660/1-289  
SLG\_07240/1-277  
g|87198816|1-310  
SG61\_2705/1-303  
SG61\_1498/1-309  
SLG\_35900/1-311  
g|87198727|1-305  
SG61\_3329/1-309  
SLG\_12640/1-304  
SG61\_2549/1-315  
SLG\_28340/1-294  
SG61\_2706/1-296  
PP\_1745/1-269  
g|334342965|Sphch/1-259  
g|87199139|1-266  
SG61\_504/1-269  
SG61\_782/1-273  
SLG\_38070/1-265  
SLG\_27950/1-266  
g|87200928|1-272  
g|146275769|Naro/1-259  
g|146275845|Naro/1-289  
4BMV:A|PDBID|n-penty|1-262  
PP\_2989/1-264  
SLG\_18780/1-267  
PP\_0429/1-260  
g|334343146|Sphch/1-268  
g|334343373|Sphch/1-250  
SG61\_417/1-252

244 G A I W N M A G G W F A Q  
251 G A N M S I D G G W T A Q  
249 G A N I S V D G G W T A G  
249 G A N Y N M D G G W V A E  
245 G A N Y S I D G G W T A E  
248 G Q S F I V S H G W Y M Q  
253 G A I L P I E G G W L A R  
242 G R G I E V S G G R R H A S  
233 G E I I H V N G G L F M A  
246 G T V I K I D D G Q S P R  
234 G Q A Q V L D A G L L S T F A  
234 G A L F S I D G G Q L A G  
264 G S H V V I D G G M M L G K Y  
264 G S H V M I D G G M Q L G P I  
263 G A Q M L I D G G M A L G K F  
259 G Q Q F V I D G G L S L S A A  
241 G Q E F V V D G G M T R K M  
246 G S T I A L D G G Y I A A L  
251 G E I V S V S S Q R A  
234 G V V L S S D G G L A L  
241 A E V I R L D G A I R M A P K  
240 G E V I R L D G A I R M A P K  
245 G E D V R L D G G I R M A P R  
247 G E D V R L D G A I R M A P R  
246 G E H V R L D G A I R M Q P K  
241 G E V I R L D G A L R M A A K  
234 G E V I R L D A G A R P P A R  
234 G A T W D A N G G L F M R  
237 G A C L D I N G G M L M R  
239 M T V M A S N M P F V G R G  
237 L T V M P T K M P F I G R G  
231 A M I V Q N K L P F L G R G  
230 T T I L P I A Q P Y L G R G  
242 G N T L F V D G G G H I N G V  
240 S R T L H V D G G R A F Y D  
247 S Q M I P V N G G L A Y T R  
238 G A A L P I D C D L Q H G  
243 G Q T L F V D G G L C L T  
221 G Q N I K V D G G L T R S V  
229 I N T I E I M P V A Q S S A A  
228 I N T L E M P V T Q S Y A G  
228 L N R I E L M P V S Q S F A G  
232 I N S L E L M P V S Q D W A G  
229 V S E M V V R P T A S P F  
229 I N E I V V R P T A A G M  
251 P H P Q S I A L V E E A A N R  
249 T D R V M L Q A L E D R H R E  
250 P Y P E A K D G L R Q H F D A  
250 P Y P E V R E G L E K H F Q A  
251 P Y P E F A E G Q K A R D Q E  
256 S H P D H K E E L R E I F D E  
252 T H P D H K E E L K E L F D E  
254 T H G E F A N R M R E R A E A  
254 T H G M Y K D A M R A R A Q A  
251 T H G N W R E T C E A R F Q A  
251 T H P Q F I D S V K A R H A A  
248 T H A E F L T G V E E R G L A  
257 T A P E F R P G I T D R F E A  
253 T H P E F A P G I K A R N D A  
257 T H P E F T K G I E A R N N A  
251 T H G E F A D D F E E I Y R T  
255 T H P E H G P D F E E I H A A  
250 T H P E F A E D F E D I Y E T  
246 T N R E F L P E V Q Q R N R E  
244 T H A E F L E E V Q E R H R T  
242 P H G E F R D E V A G Y F N D  
233 P H E A G R Q A W Q L K R Q A P  
235 I  
235 V  
235 V  
246  
243  
243  
233  
247  
266  
226  
227  
223  
237  
237  
237

256  
263  
261  
261  
257  
260  
265  
255  
245  
258  
256  
246  
279  
283  
278  
275  
257  
259  
261  
245  
255  
254  
259  
261  
260  
255  
254  
246  
249  
252  
250  
244  
243  
266  
254  
260  
250  
255  
234  
253  
248  
249  
254  
306  
305  
297  
310  
305  
280  
291  
289  
277  
310  
303  
309  
311  
305  
309  
304  
315  
294  
296  
269  
259  
266  
269  
273  
265  
266  
272  
259  
289  
262  
264  
267  
260  
268  
250  
252

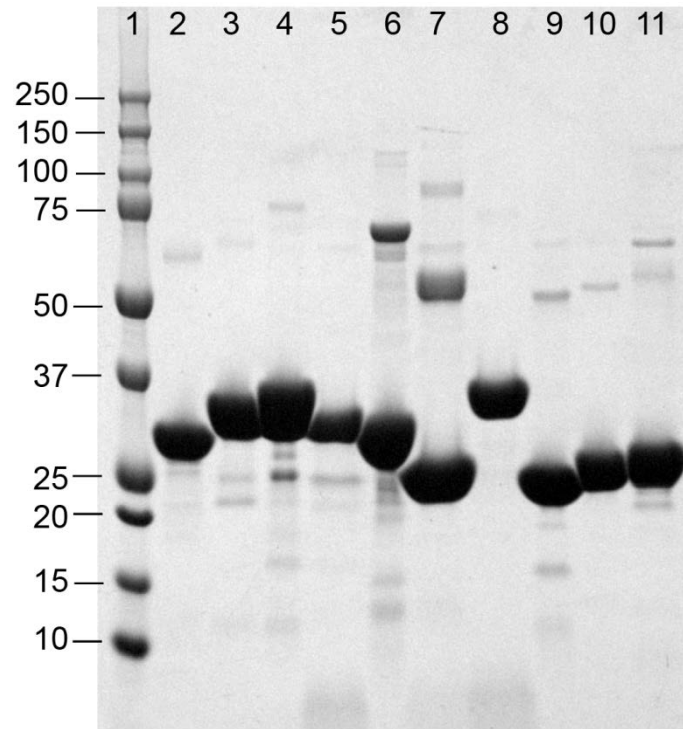

**Fig. S4. SDS-PAGE Gel of purified GGE dehydrogenase enzymes.** lane 1.

Precision Plus Protein™ Prestained Standards; lane 2. SG61-1L 474; lane 3. SG61-1L 724; lane 4. SG61-1L 1498; lane 5. SG61-1L 2705; lane 6. SG61-1L 2550; lane 7. SG61-1L 3175; lane 8. SG61-1L 3329; lane 9. SG61-1L 3344; lane 10. SG61-1L 3726; lane 11. SG61-1L 3730.

**Table S1.** Retention times and m/z values for metabolites observed during GGE degradation

| Compound      | Molecular weight | Authentic standard |                                               | SYK-6    |                                               | SG61-1L  |                                               |
|---------------|------------------|--------------------|-----------------------------------------------|----------|-----------------------------------------------|----------|-----------------------------------------------|
|               |                  | Rt (min)           | m/z<br>[molecular ion]                        | Rt (min) | m/z<br>[molecular ion]                        | Rt (min) | m/z<br>[molecular ion]                        |
| GGE           | 320.34           | 5.10               | 303.12<br>[M-H <sub>2</sub> O+H] <sup>+</sup> | 5.12     | 303.12<br>[M-H <sub>2</sub> O+H] <sup>+</sup> | 5.10     | 303.13<br>[M-H <sub>2</sub> O+H] <sup>+</sup> |
| MPHPV         | 318.32           | -                  | -                                             | 6.78     | 319.10<br>[M+H] <sup>+</sup>                  | 6.77     | 319.12<br>[M+H] <sup>+</sup>                  |
| HPV           | 196.20           | -                  | -                                             | 3.78     | 197.06<br>[M+H] <sup>+</sup>                  | 3.79     | 197.03<br>[M+H] <sup>+</sup>                  |
| Vanillin      | 152.15           | 5.52               | 153.05<br>[M+H] <sup>+</sup>                  | 5.53     | 153.05<br>[M+H] <sup>+</sup>                  | 5.52     | 153.05<br>[M+H] <sup>+</sup>                  |
| Vanillic acid | 168.15           | 4.16               | 169.05<br>[M+H] <sup>+</sup>                  | 4.16     | 169.08<br>[M+H] <sup>+</sup>                  | 4.16     | 169.04<br>[M+H] <sup>+</sup>                  |
| Guaiacol      | 124.14           | 7.50               | n/a                                           | 7.54     | n/a                                           | 7.52     | n/a                                           |

**Table S2.** Protein names and corresponding accession numbers for genes encoding proteins included in the phylogenetic analysis.

| Gene name              | gene identification (GI) number or accession ID | Reference |
|------------------------|-------------------------------------------------|-----------|
| ADH_Syanoikuyae        | 4BMV (pdb ID)                                   | (1)       |
| Ga5DH_Ssuis            | 146318879                                       | (2)       |
| phaB_Synechocystis     | 16330475                                        | (3)       |
| bdh_Pputida            | 167033792                                       | (4, 5)    |
| 2,5-DDOL_Spaucimobilis | 1708836                                         | (6)       |
| kduD_Ecoli             | 1730032                                         | (7)       |
| ydfG_Ecoli             | 2506152                                         | (8)       |
| LVR_Caquaticum         | 31615388                                        | (9)       |
| (R)-ADH_Lkefiri        | 33112056                                        | (10)      |
| fabG_Ecoli             | 388477173                                       | (11)      |
| badH_Rpalustris        | 39647578                                        | (12)      |
| ADH_Ralstonia          | 512125550                                       | (1)       |
| phaB_Burkholderia      | 518742570                                       | (13)      |
| CPNA_Comamonas         | 62286565                                        | (14)      |
| Gluc-DH_Bsubtilis      | 649014081                                       | (15)      |
| steA_Ctestosteroni     | 729773326                                       | (16)      |
| (S)-PED_Aaro           | 81821161                                        | (17)      |
| bdh1_Rpickettii        | 84570594                                        | (18)      |
| bdh2_Rpickettii        | 84570596                                        | (18)      |
| SG61_1203              | SZ64_06710                                      |           |
| SG61_1215              | SZ64_06655                                      |           |
| SG61_1243              | SZ64_06525                                      |           |
| SG61_1419              | SZ64_05615                                      |           |
| SG61_1498              | SZ64_05225                                      | this work |
| SG61_2016              | SZ64_08220                                      |           |
| SG61_2549              | SZ64_00035                                      | this work |
| SG61_2550              | SZ64_00030                                      | this work |
| SG61_2583              | SZ64_09815                                      |           |
| SG61_2705              | SZ64_01645                                      | this work |
| SG61_2706              | SZ64_01650                                      | this work |
| SG61_2863              | SZ64_11380                                      |           |
| SG61_3175              | SZ64_16025                                      | this work |
| SG61_3191              | SZ64_15940                                      | this work |
| SG61_3329              | SZ64_12360                                      | this work |
| SG61_3344              | SZ64_12435                                      | this work |
| SG61_354               | SZ64_16980                                      |           |
| SG61_3726              | SZ64_14315                                      | this work |
| SG61_3730              | SZ64_14335                                      | this work |
| SG61_417               | SZ64_16655                                      | this work |
| SG61_474               | SZ64_16365                                      |           |
| SG61_504               | SZ64_17190                                      |           |
| SG61_609               | SZ64_02580                                      |           |
| SG61_724               | SZ64_15290                                      | this work |
| SG61_782               | SZ64_15575                                      |           |
| SG61_907               | SZ64_14565                                      |           |

## REFERENCES

1. **Man H, Kedziora K, Kulig J, Frank A, Lavandera I, Gotor-Fernandez V, Rother D, Hart S, Turkenburg JP, Grogan G.** 2014. Structures of Alcohol Dehydrogenases from *Ralstonia* and *Sphingobium* spp. Reveal the Molecular Basis for Their Recognition of 'Bulky-Bulky' Ketones. *Topics in Catalysis* **57**:356-365.
2. **Zhang QM, Peng H, Gao F, Liu YW, Cheng H, Thompson J, Gao GF.** 2009. Structural insight into the catalytic mechanism of gluconate 5-dehydrogenase from *Streptococcus suis*: Crystal structures of the substrate-free and quaternary complex enzymes. *Protein Science* **18**:294-303.
3. **Taroncher-Oldenberg G, Nishina K, Stephanopoulos G.** 2000. Identification and analysis of the polyhydroxyalkanoate-specific beta-ketothiolase and acetoacetyl coenzyme A reductase genes in the cyanobacterium *Synechocystis* sp strain PCC6803. *Applied and Environmental Microbiology* **66**:4440-4448.
4. **Paithankar KS, Feller C, Kuettner EB, Keim A, Grunow M, Strater N.** 2007. Cosubstrate-induced dynamics of D-3-hydroxybutyrate dehydrogenase from *Pseudomonas putida*. *Febs Journal* **274**:5767-5779.
5. **Feller C, Gunther R, Hofmann HJ, Grunow M.** 2006. Molecular basis of substrate recognition in D-3-hydroxybutyrate dehydrogenase from *Pseudomonas putida*. *Chembiochem* **7**:1410-1418.
6. **Nagata Y, Ohtomo R, Miyauchi K, Fukuda M, Yano K, Takagi M.** 1994. Cloning and Sequencing of a 2,5-Dichloro-2,5-Cyclohexadiene-1,4-Diol Dehydrogenase Gene Involved in the Degradation of Gamma-Hexachlorocyclohexane in *Pseudomonas-Paucimobilis*. *Journal of Bacteriology* **176**:3117-3125.
7. **Tubeleviciute A, Teese MG, Jose J.** 2014. *Escherichia coli* kduD encodes an oxidoreductase that converts both sugar and steroid substrates. *Applied Microbiology and Biotechnology* **98**:5471-5485.
8. **Fujisawa H, Nagata S, Misono H.** 2003. Characterization of short-chain dehydrogenase/reductase homologues of *Escherichia coli* (YdfG) and *Saccharomyces cerevisiae* (YMR226C). *Biochimica Et Biophysica Acta-Proteins and Proteomics* **1645**:89-94.
9. **Sogabe S, Yoshizumi A, Fukami TA, Shiratori Y, Shimizu S, Takagi H, Nakamori S, Wada M.** 2003. The crystal structure and stereospecificity of levodione reductase from *Corynebacterium aquaticum* M-13. *Journal of Biological Chemistry* **278**:19387-19395.
10. **Chen QL, Hu YJ, Zhao WJ, Zhu CB, Zhu BQ.** 2010. Cloning, Expression, and Characterization of a Novel (S)-Specific Alcohol Dehydrogenase from *Lactobacillus kefir*. *Applied Biochemistry and Biotechnology* **160**:19-29.
11. **Price AC, Zhang YM, Rock CO, White SW.** 2001. Structure of beta-ketoacyl-[acyl carrier protein] reductase from *Escherichia coli*: Negative cooperativity and its structural basis. *Biochemistry* **40**:12772-12781.
12. **Pelletier DA, Harwood CS.** 2000. 2-Hydroxycyclohexanecarboxyl coenzyme A dehydrogenase, an enzyme characteristic of the anaerobic benzoate degradation pathway used by *Rhodospseudomonas palustris*. *Journal of Bacteriology* **182**:2753-2760.
13. **Kim JK, Won YJ, Nikoh N, Nakayama H, Han SH, Kikuchi Y, Rhee YH, Park HY, Kwon JY, Kurokawa K, Dohmae N, Fukatsu T, Lee BL.** 2013. Polyester synthesis genes associated with stress resistance are involved in an insect-bacterium symbiosis. *Proceedings of the National Academy of Sciences of the United States of America* **110**:E2381-E2389.
14. **Iwaki H, Hasegawa Y, Wang SZ, Kayser MM, Lau PCK.** 2002. Cloning and characterization of a gene cluster involved in cyclopentanol metabolism in *Comamonas* sp strain NCIMB 9872 and biotransformations effected by *Escherichia coli*-expressed cyclopentanone 1,2-monooxygenase. *Applied and Environmental Microbiology* **68**:5671-5684.
15. **Hilt W, Pfeleiderer G, Fortnagel P.** 1991. Glucose-Dehydrogenase from *Bacillus-Subtilis* Expressed in *Escherichia-Coli* .1. Purification, Characterization and Comparison with Glucose-Dehydrogenase from *Bacillus-Megaterium*. *Biochimica Et Biophysica Acta* **1076**:298-304.
16. **Horinouchi M, Hayashi T, Koshino H, Malon M, Yamamoto T, Kudo T.** 2008. Identification of genes involved in inversion of stereochemistry of a C-12 hydroxyl group in the catabolism of cholic acid by *Comamonas testosteroni* TA441. *Journal of Bacteriology* **190**:5545-5554.



17. **Dudzik A, Snoch W, Borowiecki P, Opalinska-Piskorz J, Witko M, Heider J, Szaleniec M.** 2014. Asymmetric reduction of ketones and  $\beta$ -keto esters by (S)-1-phenylethanol dehydrogenase from denitrifying bacterium *Aromatoleum aromaticum*. *Applied Microbiology and Biotechnology* doi:10.1007/s00253-014-6309-z:1-15.
18. **Takanashi M, Saito T.** 2006. Characterization of two 3-hydroxybutyrate dehydrogenases in poly(3-hydroxybutyrate)-degradable bacterium, *Ralstonia pickettii* T1. *Journal of Bioscience and Bioengineering* **101**:501-507.
